# The Role for Endoplasmic Reticulum Stress in Diabetes Mellitus

Décio L. Eizirik, Alessandra K. Cardozo, and Miriam Cnop

Laboratory of Experimental Medicine (D.L.E., A.K.C., M.C.), Université Libre de Bruxelles, Division of Endocrinology (M.C.), Erasmus Hospital, 1070 Brussels, Belgium

Accumulating evidence suggests that endoplasmic reticulum (ER) stress plays a role in the pathogenesis of diabetes, contributing to pancreatic  $\beta$ -cell loss and insulin resistance. Components of the unfolded protein response (UPR) play a dual role in  $\beta$ -cells, acting as beneficial regulators under physiological conditions or as triggers of  $\beta$ -cell dysfunction and apoptosis under situations of chronic stress. Novel findings suggest that “what makes a  $\beta$ -cell a  $\beta$ -cell”, *i.e.*, its enormous capacity to synthesize and secrete insulin, is also its Achilles heel, rendering it vulnerable to chronic high glucose and fatty acid exposure, agents that contribute to  $\beta$ -cell failure in type 2 diabetes. In this review, we address the transition from physiology to pathology, namely how and why the physiological UPR evolves to a proapoptotic ER stress response and

which defenses are triggered by  $\beta$ -cells against these challenges. ER stress may also link obesity and insulin resistance in type 2 diabetes. High fat feeding and obesity induce ER stress in liver, which suppresses insulin signaling via c-Jun N-terminal kinase activation. *In vitro* data suggest that ER stress may also contribute to cytokine-induced  $\beta$ -cell death. Thus, the cytokines IL-1 $\beta$  and interferon- $\gamma$ , putative mediators of  $\beta$ -cell loss in type 1 diabetes, induce severe ER stress through, respectively, NO-mediated depletion of ER calcium and inhibition of ER chaperones, thus hampering  $\beta$ -cell defenses and amplifying the proapoptotic pathways. A better understanding of the pathways regulating ER stress in  $\beta$ -cells may be instrumental for the design of novel therapies to prevent  $\beta$ -cell loss in diabetes. (*Endocrine Reviews* 29: 42–61, 2008)

- I. Introduction
- II. Endoplasmic Reticulum (ER) Stress and the Unfolded Protein Response (UPR)
  - A. The dialogue between the ER and the nucleus
  - B. ER stress and apoptosis
- III. The UPR and  $\beta$ -Cell Adaptation to Physiological Demand
- IV. ER Stress and  $\beta$ -Cell Death in Monogenic and Type 2 Diabetes
  - A. ER stress and human diabetes
  - B. Animal models of ER stress and diabetes
- V. ER Stress and  $\beta$ -Cell Death in Type 1 Diabetes—the Role of Cytokines and Nitric Oxide (NO)
- VI.  $\beta$ -Cell Recovery from ER Stress
- VII. ER Stress as a Putative Link between Obesity and Insulin Resistance
  - A. Liver
  - B. Adipose tissue
- VIII. Future Areas of Research
- C. Lipotoxicity and glucotoxicity as triggers of ER stress—when physiology turns into pathology

## I. Introduction

THE TWO MAIN forms of diabetes mellitus are type 1 and type 2 diabetes (1). They are a major cause of morbidity and mortality, decreasing both life quality and life expectancy of millions of affected individuals. A reduction in  $\beta$ -cell mass, due to increased  $\beta$ -cell apoptosis and defective  $\beta$ -cell regeneration, is a key component of diabetes mellitus (2–4). In the case of type 2 diabetes, this is very often accompanied by insulin resistance in fat, muscle, and liver (5). The molecular mechanisms underlying decreased  $\beta$ -cell mass and insulin resistance remain to be clarified.

Type 1 diabetes is characterized by a severe lack of insulin production due to specific destruction of the pancreatic  $\beta$ -cells that typically develops over several years. Although some immune-related biomarkers (*i.e.*, autoantibodies to IA-2, GAD65, and insulin) can identify individuals at risk for type 1 diabetes, the process by which the  $\beta$ -cells are destroyed is not well understood.  $\beta$ -Cell loss in type 1 diabetes is the result of an autoimmune-mediated process, where a chronic inflammation called insulinitis causes  $\beta$ -cell destruction. This is mediated by cytokines and other factors released

First Published Online November 29, 2007

Abbreviations: AP-1, Activator protein-1; ASK, apoptosis-signal-regulating kinase; ATF, activating transcription factor; BIP (also known as GRP78 or HSPA5), Ig heavy chain binding protein; C/EBP, CCAAT/enhancer binding protein; CHOP (also known as GADD153 or DDIT3), C/EBP homologous protein; CPA, cyclopiazonic acid; eIF, eukaryotic translation initiation factor; ER, endoplasmic reticulum; ERAD, ER-associated degradation pathway; FFA, free fatty acid; GADD, growth arrest and DNA damage inducible gene; IAPP, islet amyloid polypeptide; IFN- $\gamma$ , interferon- $\gamma$ ; iNOS, inducible nitric oxide synthase; IRE, inositol requiring ER-to-nucleus signal kinase; IRS, insulin receptor substrate; JNK, c-Jun N-terminal kinase; NF- $\kappa$ B, nuclear factor  $\kappa$ B; NO, nitric oxide; NOD, nonobese diabetic; ORF, open reading frame; ORP150 (also known as GRP170), oxygen-regulated protein 150; PDI, protein disulfide isomerase; PERK, PKR-like ER kinase; PKR, double-stranded RNA-activated kinase; PP, protein phosphatase; ROS, reactive oxygen species; SERCA, sarcoendoplasmic reticulum Ca<sup>2+</sup> ATPase; S1P, site-1 protease; STAT, signal transducer and activator of transcription; TRAF, TNF receptor-associated factor; uORF, upstream ORF; UPR, unfolded protein response; SREBP, sterol-response element-binding protein; WFS1, Wolfram syndrome gene 1; XBP1, X-box binding protein-1; XBP1s, spliced XBP1.

*Endocrine Reviews* is published by The Endocrine Society (<http://www.endo-society.org>), the foremost professional society serving the endocrine community.

by and/or expressed on the surface of the immune cells invading the islets, which trigger secondary pathways of cell death in the target  $\beta$ -cells (2, 3, 6).

Type 2 diabetes results from a reduced ability of the pancreatic  $\beta$ -cells to secrete enough insulin to stimulate glucose utilization by peripheral tissues (7). As  $\beta$ -cell secretory capacity deteriorates, glucose tolerance worsens and fasting glucose levels progressively increase, eventually culminating in overt hyperglycemia (8–10). Defects in both insulin secretion and action contribute to the pathogenesis of type 2 diabetes, but it is now acknowledged that insulin deficiency is the crucial constituent, without which type 2 diabetes does not develop. This  $\beta$ -cell defect is present early in the disease process (7) and detectable as markedly reduced first phase or acute glucose-induced insulin secretion (11, 12). The genetic factors that predispose a subset of obese individuals to  $\beta$ -cell failure are now being identified (13–17), but the underlying biological mechanisms are not yet understood. From post-mortem studies, it has been shown that type 2 diabetic patients have reduced  $\beta$ -cell mass (18–22) and increased  $\beta$ -cell apoptosis rates (21). It is unlikely that  $\beta$ -cell loss entirely accounts for reduced insulin secretion in type 2 diabetes, and the extent of its contribution to diabetes development will remain unclear until *in vivo* tools for imaging of  $\beta$ -cell mass become available. The loss of  $\beta$ -cell mass in type 2 diabetes may be due to chronic exposure to high glucose and free fatty acid (FFA) levels (gluco- and lipotoxicity) (5, 23, 24).

Accumulating evidence indicates that  $\beta$ -cell loss in both type 1 and type 2 diabetes results from stress responses regulated by key transcription factors and gene networks (25). Initial suggestions that  $\beta$ -cell apoptosis in both forms of diabetes is mediated by a common “up-stream” pathway, dependent on IL-1 $\beta$  production and activation of the Fas-FasL system (26), have not been confirmed (27, 28). Instead, it seems that there are diverging up-stream proapoptotic signals in both forms of diabetes, depending on the transcription factors nuclear factor (NF)- $\kappa$ B and signal transducer and activator of transcription (STAT)-1 in type 1 diabetes and on other signaling molecules, still to be discovered, in type 2 diabetes (Fig. 1). These early signaling pathways may converge downstream into common “execution” pathways, such as endoplasmic reticulum (ER) stress, mitochondrial dysfunction, and production of reactive oxygen species (ROS) (Fig. 1) (25). ER stress may also act as a link between obesity and insulin resistance in liver and fat, raising the intriguing possibility that this cellular response is a common mechanism for both  $\beta$ -cell failure and defective insulin signaling in type 2 diabetes.

In the present review, we will focus on the role for ER stress in diabetes, with special emphasis on recent findings clarifying the transition between “normal” and “pathological” ER stress responses.

## II. Endoplasmic Reticulum (ER) Stress and the Unfolded Protein Response (UPR)

The ER is a highly dynamic organelle with a central role in lipid and protein biosynthesis. The ER produces the transmembrane proteins and lipids for most cell organelles and is

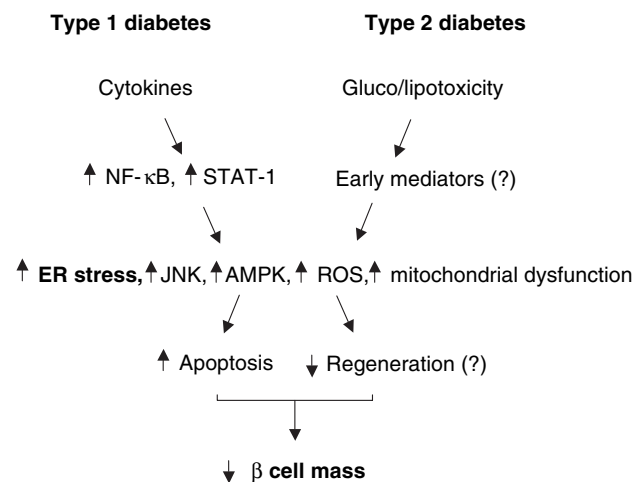

FIG. 1.  $\beta$ -Cell loss in type 1 and type 2 diabetes results from stress responses that may lead to apoptosis. There are diverging up-stream proapoptotic signals in both forms of diabetes, depending on the transcription factors NF- $\kappa$ B and STAT-1 in type 1 diabetes and on other signaling molecules, still to be discovered, in type 2 diabetes. These early signaling pathways may converge downstream into potentially common “execution” pathways, such as ER stress, activation of JNK and AMP-activated protein kinase (AMPK), mitochondrial dysfunction, and production of oxygen free radicals (ROS).

responsible for the synthesis of almost all secreted proteins. The ER also has an important role in  $\text{Ca}^{2+}$  storage and signaling. The resting intra-ER  $\text{Ca}^{2+}$  concentration is three to four orders of magnitude higher than cytosolic  $\text{Ca}^{2+}$ . This gradient is generated by the sarco(endo)plasmic reticulum  $\text{Ca}^{2+}$  ATPase (SERCA) proteins, which pump  $\text{Ca}^{2+}$  into the ER, and the Ins(1,4,5) $\text{P}_3$  and ryanodine receptors that release  $\text{Ca}^{2+}$  from the ER (29). Due to its ability to store and secrete  $\text{Ca}^{2+}$ , the ER controls a wide range of cellular processes such as organogenesis, transcriptional activity, stress responses, and apoptosis (29).

The translation of proteins is performed by ribosomes on the cytosolic surface of the ER (30), and the unfolded polypeptide chains are translocated into the ER lumen via the Sec61 complex (31). In the ER lumen these chains are often N-glycosylated and folded into secondary and tertiary structures that are stabilized by disulfide bonds (32). The unique oxidizing environment of the ER and the numerous protein chaperones present in the organelle are crucial for the proper folding of proteins and protein complexes (33). The disulfide bond formation is catalyzed by protein disulfide isomerase (PDI) (34). PDI is oxidized by Ero1 $\alpha$  (35) and - $\beta$  (36) into a disulfide donor, whereas reduced PDI can isomerize disulfide bonds in client proteins. Other ER-resident folding factors include amino acid cis-trans isomerases, the chaperones GRP94 and Ig heavy chain binding protein (BiP), N-glycosylation enzymes and the lectins calnexin and calreticulin that specifically chaperone N-glycans (37), all of which operate in complex multiprotein structures (38). While assisting with folding, these chaperones and foldases also retain client proteins in the ER until the maturely folded proteins meet all quality control standards and exit the ER (39–41).

The ER is exquisitely sensitive to alterations in homeostasis, and proteins formed in the ER may fail to attain correct

conformation due to: 1) lack of chaperones or cellular energy to promote chaperone-protein interactions; 2)  $\text{Ca}^{2+}$  depletion; 3) disruption of redox state; 4) protein mutations that hamper adequate folding; and 5) reduction of disulfide bonds. Accumulation of misfolded proteins that aggregate in the ER lumen causes ER stress and activation of a signal response termed the UPR (42–45). The aim of the UPR is to alleviate ER stress, restore ER homeostasis, and prevent cell death. To achieve these goals, the UPR induces several coordinated responses, including: 1) a decrease in the arrival of new proteins into the ER, thus preventing additional protein misfolding and overloading of the organelle; 2) an increase in the amount of ER chaperones, thus augmenting the folding capacity of the ER to deal with misfolded proteins; 3) an increase in the extrusion of irreversibly misfolded proteins from the ER and subsequently degradation of these proteins in the proteasome; and 4) in case the steps described above fail, apoptosis is triggered. Because these responses depend at least in part on *de novo* gene transcription, signals must be transmitted from the ER to the nucleus indicating the urgent need for the expression of relevant mRNAs and proteins.

This signaling is mediated by three transmembrane ER proteins: inositol requiring ER-to-nucleus signal kinase (IRE) 1, activating transcription factor (ATF) 6, and double-stranded RNA-activated kinase (PKR)-like ER kinase (PERK) (Fig. 2). These proteins become active when unfolded proteins accumulate in the lumen of the ER and translate this information into signals that modulate expression of key genes and proteins.

#### A. The dialogue between the ER and the nucleus

The discovery of the signal transduction regulating the UPR is a telling example of the crucial role of basic research in model organisms such as yeast for the understanding of complex human diseases (42). Kozutsumi *et al.* (46) were the first to suggest that ER stress can activate a signal transduction pathway. They observed that the expression of a mutant influenza hemagglutinin, which is unable to fold correctly, induced expression of several ER resident proteins. The clarification of this signaling pathway was first described in the yeast *Saccharomyces cerevisiae*, where a 22-bp cis-acting ele-

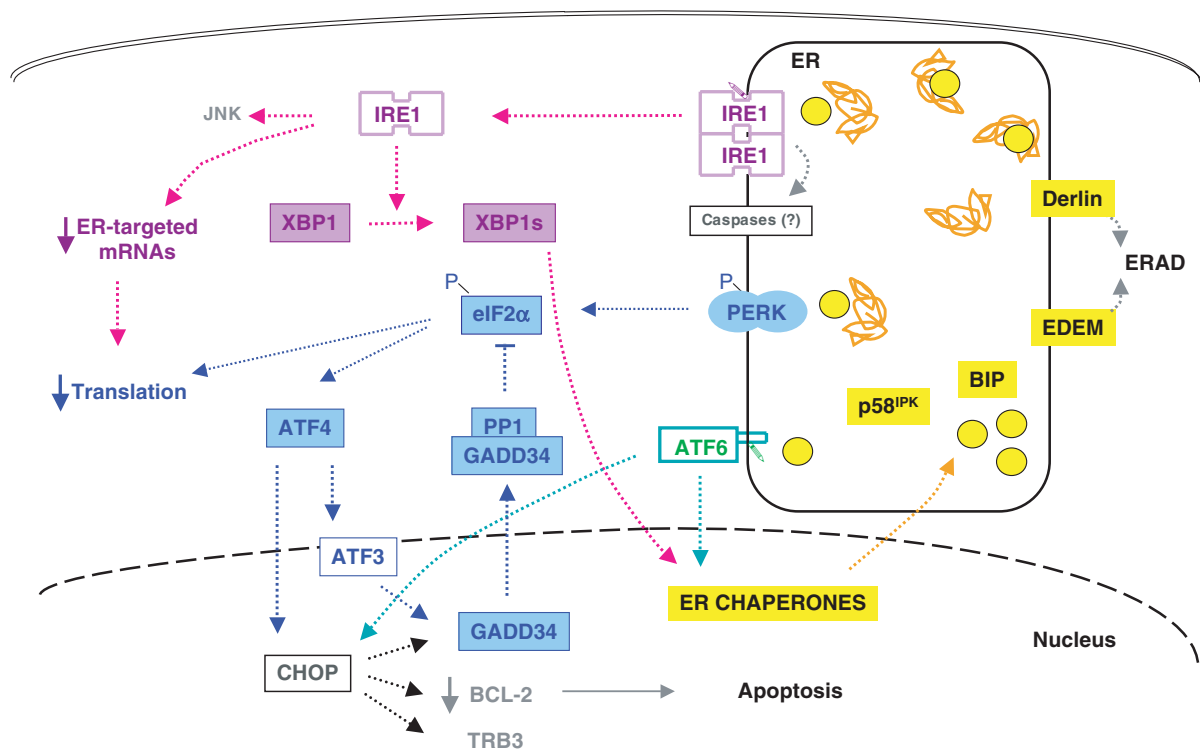

FIG. 2. Main components of the UPR. When misfolded proteins accumulate in the ER lumen, BiP (yellow circles) dissociates from the luminal side of the ER stress transducers IRE1 $\alpha$ , ATF6, and PERK, thereby activating them. IRE1 $\alpha$  activates XBP1 by its alternative splicing. XBP1s is a transcriptional transactivator of genes regulating protein maturation, folding, and export from the ER, as well as export and degradation of misfolded proteins. IRE1 $\alpha$  also degrades ER-targeted mRNAs to decrease the production of new proteins in the organelle and activates JNK. ATF6 translocates to the Golgi and is cleaved by S1P and S2P proteases. ATF6 induces transcription of ER chaperones (for clarity, only one of these ER chaperones, BiP, is shown in the figure), XBP1 and CHOP. PERK phosphorylates eIF2 $\alpha$ , thereby inhibiting global protein synthesis and decreasing the protein load in the ER. Translation of some proteins such as ATF4 is facilitated, and downstream CHOP and ATF3 expression is induced. The PERK-eIF2 $\alpha$  branch undergoes negative feedback through GADD34-mediated PP1 activation and consequent eIF2 $\alpha$  dephosphorylation, and perhaps through up-regulation of p58<sup>IPK</sup>, which may suppress PERK activity. Misfolded ER proteins are disposed of by ERAD through dislocation to the cytosol via the retrotranslocon channel composed of derlins and degradation in the ubiquitin/proteasome pathway. EDEM (ER degradation enhancing  $\alpha$ -mannosidase-like protein) contributes to this process by targeting misfolded mannose-trimmed glycoproteins for degradation. Prolonged and excessive ER stress may trigger apoptosis through JNK, CHOP, and ATF-3 and inhibition of Bcl-2 and/or activation of proapoptotic members of the Bcl-2 family. Execution of apoptosis may involve caspases whose nature remains unclear. Additional information and supporting references are provided in the text.

ment termed the UPR element was identified in the promoter of most genes up-regulated by UPR (47, 48). Subsequent screening of yeast mutants unable to induce UPR element led to the identification of an ER transmembrane protein, Ire1p (49–52). Ire1p is a bifunctional enzyme with Ser/Thr kinase and endoribonuclease activities in its carboxy-terminal domain and an ER stress-sensing domain in its N-terminal part. The endoribonuclease of Ire1p has as the main substrate the homologous to ATF/CREB1 mRNA that encodes the basic leucine zipper transcription factor Hac1. HAC1 is constitutively transcribed, but it is not translated due to the presence of a nonconventional intron of 252 bp at the 3' end of the open reading frame (ORF), which base-pairs to the 5' untranslated region and prevents translation. During ER stress, Ire1p is activated by dimerization and autophosphorylation, and its RNase activity cleaves unspliced HAC1 mRNA, generating exon fragments that are then joined together by a tRNA ligase (53–55). This highly unique signal transduction pathway depends also on the transcriptional coactivator alteration/deficiency in activation (56) and will lead to removal of the inhibitory intron of HAC1, allowing translation of the transcription activator Hac1, which induces the transcription of ER stress-responsive genes (53, 54). There are two mammalian homologs of Ire1p: IRE1 $\alpha$ , expressed in most cells and tissues with high levels of expression in pancreas, and IRE1 $\beta$ , which is mainly expressed in intestinal epithelial cells (57, 58). Once activated, the cytoplasmic domain of IRE1 $\alpha$  gains endoribonuclease activity and cleaves 26 nucleotides from the mRNA encoding X-box binding protein (XBP) 1, generating a spliced variant (XBP1s) that functions as a potent transcriptional transactivator of genes involved in ER expansion, protein maturation, folding and export from the ER, as well as export and degradation of misfolded proteins (Fig. 2) (59–64). IRE1 $\alpha$  may also degrade ER-targeted mRNAs, thus decreasing the production of new proteins in the organelle (65, 66).

In addition to IRE1, higher eukaryotic cells have two additional UPR transducers: PERK and ATF6 (Fig. 2). These ER stress transducers are usually inactive due to binding to the ER chaperone BiP, but they are activated when BiP dissociates from their luminal side to assist in protein folding, signaling depletion of ER chaperone reserves (67–70). It has been proposed that IRE1 also directly binds to unfolded proteins (71), but this hypothesis was not confirmed by detailed studies of the x-ray crystal structure of the luminal domain of IRE1 and by functional studies indicating that IRE1 can dimerize independently of the presence of unfolded proteins (72). Recent findings in yeast indicate the presence of additional and potentially novel mechanisms of IRE1 regulation (73).

ATF6 $\alpha$  is a 90-kDa bZIP protein that is activated by post-translational modifications. The disulfide and glycosylation-bound status of the ATF6 $\alpha$  ER luminal domain probably participates in the sensing of ER stress (74, 75). ATF6 activation leads to its translocation to the Golgi and cleavage of the membrane by site-1 protease (S1P) and S2P. The 50-kDa cleaved ATF6 $\alpha$  translocates to the cell nucleus where it binds to the ER stress response element CCAAT(N)9CCACG (76) in genes encoding ER chaperone proteins, increasing protein folding activity in the ER (76, 77). There are two main chap-

erone systems in the ER, namely the calnexin/calreticulin (lectin chaperones) and BiP/GRP94 (heat shock protein family); components of both systems are up-regulated by ATF6 $\alpha$  in some cases in cooperation with XBP1s (61, 77, 78). ATF6 augments the expression of XBP1 mRNA, providing more substrate for IRE1-induced generation of XBP1s (61). Another important cochaperone in the ER lumen is P58<sup>IPK</sup>, which is associated with BiP and favors protein maturation (79). ATF6 $\alpha$  is ubiquitously expressed (80), but in recent years several tissue-specific ER transmembrane proteins that are similarly cleaved by S1P and S2P have been identified, including cAMP-responsive element binding protein, old astrocyte specifically induced substance (OASIS), luman, and TISP40 (81–84).

PERK phosphorylates eukaryotic translation initiation factor (eIF) 2 $\alpha$ , thereby inhibiting 80S ribosome assembly and protein synthesis and consequently decreasing the functional demand on the ER (85). eIF2 $\alpha$  phosphorylation causes a general decrease in translation, but some selected proteins such as ATF4 are translated more efficiently (86, 87). The ATF4 mRNA has two upstream ORFs (uORF)s before the initiation codon. The 5' proximal uORF1 is a positive-acting element that facilitates ribosome scanning and reinitiation at downstream coding regions, whereas the second (uORF2) is out of frame with the true ATF4 coding sequence. In non-stressed cells, which contain low levels of phosphorylated eIF2 $\alpha$ , ribosomes scanning downstream of uORF1 reinitiate at the next coding region, namely uORF2, thus preventing effective ATF4 translation. During ER stress, however, the presence of high levels of eIF2 $\alpha$  phosphorylation delays the capacitation of scanning ribosomes, favoring reinitiation at the ATF4 initiation codon and resulting in increased ATF4 translation (88, 89). ATF4 regulates genes involved in amino acid import, glutathione biosynthesis, and resistance to oxidative stress (90). ATF4 also induces the expression of the proapoptotic genes CCAAT/enhancer binding protein (C/EBP) homologous protein (CHOP) and ATF3 (91–93). Recovery from the translational repression caused by eIF2 $\alpha$  phosphorylation is mediated by growth arrest and DNA damage inducible gene (GADD) 34, which interacts with the catalytic subunit of protein phosphatase (PP) 1c and leads to eIF2 $\alpha$  dephosphorylation (94–99). It was suggested that PERK function is also modulated by the cochaperone p58<sup>IPK</sup> (100, 101). A recent study, however, indicates that whereas a putative small cytosolic p58<sup>IPK</sup> fraction might mitigate translational attenuation via PERK inhibition, its predominant ER luminal localization suggests that p58<sup>IPK</sup> functions mainly as a chaperone (79). An additional mechanism exists to selectively decrease protein load in the ER, the “preemptive quality control.” Thus, during ER stress, ER signal sequences in the protein will determine whether or not it gains access to the ER; for instance, while the chaperone BiP continues to translocate into the ER, proteins destined for the plasma membrane are denied access (102).

The phenotypes caused by targeted deletion of the PERK/eIF2 $\alpha$  and IRE1/XBP1 pathways are not identical, indicating both overlapping and divergent functions for these pathways (103). Different secretory cells seem to utilize preferentially one or the other pathway *in vivo*. Thus, UPR-induced translational control via eIF2 $\alpha$  phosphorylation is not re-

quired for B lymphocyte differentiation/maturation (104), whereas deficiency in the PERK-eIF2 $\alpha$  pathway leads to progressive loss of pancreatic  $\beta$ -cells (105, 106). XBP1 deletion causes severe abnormalities in exocrine pancreas and salivary glands but does not affect embryonic development of islet cells (64, 103). These discrepancies underscore the need to evaluate the specific regulation and role of the UPR in differentiated secretory cells, such as  $\beta$ -cells, instead of relying on data obtained in genetically modified embryonic fibroblasts, a model widely used in the field.

Misfolded ER proteins are disposed of by the ER-associated degradation (ERAD) after a time lag of 30–90 min. Protein disposal requires retrotranslocation into the cytosol, via a presumptive retrotranslocon channel, and subsequent degradation by the ubiquitin/proteasome pathway (107). Recent evidence has implicated the mammalian translocon-associated protein complex, which associates with Sec61, binds preferentially to misfolded proteins, and accelerates their degradation (108). Other proteins that play an important role as translocon channels are the derlins (109–112). An alternative model has recently been presented in which lipid droplet formation from the ER membrane mediates misfolded protein dislocation from the ER (113).

Autophagy was recently described as a new alternative pathway that targets proteins for degradation during ER stress in yeast and mammalian cells (114–117). During autophagy, parts of the cytoplasm, including its organelles, are sequestered into membrane-bound compartments that then fuse with lysosomes where their content is degraded by acid hydrolases (118). An ER-selective UPR-induced form of autophagy, ER-phagy, is apparently required for cell survival under conditions of severe ER stress (114–116). Besides helping to clear misfolded proteins, the ER-phagy reduces the volume of the ER that is increased during the UPR. It remains to be clarified how ER stress and the UPR activate autophagy, but the IRE1 pathway seems to be involved (114, 115), and a recent study indicates that PERK/eIF2 $\alpha$  phosphorylation mediates polyglutamine-induced LC3 conversion, an important step for autophagy formation (119).

### B. ER stress and apoptosis

The integrated result of the UPR is attenuation of global protein translation paralleled by up-regulation of ER chaperones, thus increasing the folding capacity of the ER, and degradation of irreversibly misfolded proteins. In case the UPR fails to solve ER stress, the apoptosis pathway will be activated. ER stress can lead to apoptosis by various pathways, involving activation of some of the key regulators of the UPR described above. Thus, IRE1 $\alpha$  was shown to recruit the adaptor molecule TNF receptor-associated factor 2 (TRAF2) and activate c-Jun N-terminal kinase (JNK) and the downstream proapoptotic kinase apoptosis-signal-regulating kinase (ASK1) (120, 121). Neurons from ASK1 $^{-/-}$  mice are resistant to ER stress-mediated cell death, suggesting that ER stress-induced JNK and ASK is proapoptotic (121). The IRE1/TRAF2 complex can also lead to NF- $\kappa$ B activation (122, 123), which may have a pro- or antiapoptotic effect depending on the cell type and context (124). The IRE1 $\alpha$ /TRAF2 association is also required for the activation of procaspase

12, which may contribute to execution of ER stress-triggered apoptosis (see below) (125).

Decreased protein translation via the PERK pathway has mostly an antiapoptotic role during the UPR, by decreasing the protein synthesis load on the ER and providing the cell with a “resting time” to recover from the ER stress (126). In line with this hypothesis, mice with deletion of different components of the PERK pathway have progressive  $\beta$ -cell loss and diabetes (see detailed discussion on these models in *Section IV.B*). Activation of the PERK pathway also contributes to an antioxidant response through the PERK target Nrf2 and via ATF4 (90). The Nrf2 transcription factor induces antioxidant response element-containing genes, including detoxification enzymes, chaperones, and components of the proteasome, but it may also mediate crosstalk with other pathways such as IRE1 $\alpha$  (90, 127). On the other hand, prolonged activation of the PERK pathway may lead to cell death (128). Also, eIF2 $\alpha$  phosphorylation via another pathway, namely the dsRNA-activated kinase PKR, is part of the proapoptotic responses of virally infected cells (129). The capacity of different cells to endure inhibition of protein synthesis is probably cell-type dependent. For instance, salubrinal, a selective inhibitor of eIF2 $\alpha$  dephosphorylation (which consequently prolongs inhibition of translation), protects pheochromocytoma PC12 cells against ER stress-mediated apoptosis (126), whereas it triggers apoptosis in pancreatic  $\beta$ -cells (128).

Activation of the PERK pathway can also induce apoptosis via ATF4 overexpression and consequent CHOP and ATF3 induction (91, 92, 130). CHOP, also known as GADD153, has attracted special attention as a putative mediator of apoptosis in ER stress (131). CHOP is a transcription factor of the C/EBP family (131, 132). Its expression is low under non-stressed conditions, but it increases markedly in response to ER stress and other cellular stresses, such as nuclear DNA damage by alkylating agents (131, 133); it is thus not a specific marker for ER stress. Several studies point to a proapoptotic effect of CHOP downstream of irremediable ER stress (131, 134, 135), but this effect may depend on the parallel expression of other components of the UPR (136). Possible mechanisms for CHOP-induced apoptosis include: 1) translocation of Bax from the cytosol to the mitochondria (137); 2) down-regulation of Bcl-2 expression and perturbation of the cellular redox state by depletion of cellular glutathione (138) and sensitization to a subsequent oxidative stress (139); 3) up-regulation of the death receptor 5 (140) and of Bim (141) (see below); and 4) induction of TRB3, an Akt inhibitor shown to contribute to ER stress-mediated death (142).

Members of the Bcl-2 family, usually considered as regulators of the mitochondrial pathway of cell death (143), are also involved in the regulation of cell death induced by ER stress (144). The Bcl-2 protein has been found to localize at the ER, besides mitochondria and nucleus, where it modulates the permeability of the ER membrane to Ca<sup>2+</sup> (145, 146). Overexpression of Bcl-2 protects against lethal ER stress (145, 147), whereas fibroblasts deficient in Bax and Bak, proapoptotic members of the Bcl-2 family, are resistant to ER stress-induced cell death (148, 149). Bax and Bak regulate the outcome of ER stress by acting at both the mitochondrial and ER membranes and by regulating ER luminal Ca<sup>2+</sup> (150, 151).

The BH3 only proteins PUMA, Noxa, Bik, and Bim (all proapoptotic members of the Bcl-2 family) have also been reported to contribute to cell death during ER stress (152–155). Recent observations indicate that ER stress induced by thapsigargin, tunicamycin, or viral infection requires Bim activation for the induction of apoptosis in macrophages, breast, and kidney epithelial cells (141). This Bim activation depends on both transcriptional induction by CHOP/C/EBP $\alpha$  and posttranslational modifications via PP2A-mediated dephosphorylation and consequent inhibition of Bim degradation by the ubiquitin-proteasome pathway (141).

Most proapoptotic signals ultimately lead to caspase activation, but it remains to be defined whether there is a specific caspase pathway responsible for ER stress-mediated apoptosis. The involvement of initiator caspases 2, 8, and 9 and effector caspases 3, 4, and 7 has been reported (123, 150, 156–161), and caspase 12 has been proposed as a specific mediator of ER stress-induced apoptosis in rodent cells (162, 163). The human homolog of caspase 12, however, is not catalytically active (164), and recent data indicate that ER stress-induced death in rodent cells can take place in the absence of caspase 12 (165, 166).

The precise mechanisms by which ER stress leads to apoptosis remain to be clarified, and this domain is perhaps the least well understood in the field of ER stress/UPR. Many of the mechanisms proposed for triggering apoptosis are cell and context dependent, which may explain some of the apparently contradictory results.

### III. The UPR and $\beta$ -Cell Adaptation to Physiological Demand

World life expectancy has increased by 2-fold in the past two centuries (167). Dietary composition has changed profoundly in the last 25 yr, favoring energy-dense and saturated fat-enriched diets (168), and physical activity is infrequent if not rare in the Western lifestyle. The increased lifespan and high prevalence of obesity and insulin resistance poses physiological challenges to long-living cells such as pancreatic  $\beta$ -cells.  $\beta$ -Cells confronted with child and then adulthood obesity will face decades of increased demand on insulin synthesis and secretion.

The main role of pancreatic  $\beta$ -cells is the adequate synthesis and release of insulin in response to glucose and other nutrients (169). The cell is geared to this task: proinsulin mRNA represents 20% of the total mRNA expression (170), whereas (pro)insulin biosynthesis approaches 50% of the total protein production in stimulated  $\beta$ -cells (171). Insulin mRNA is translational quiescent at low (<3 mM) glucose concentrations, but after stimulation by higher glucose concentrations there is a greater than 10-fold increase in biosynthesis (172–174). Synthesis of the endo- and exoproteases involved in proinsulin conversion augments in parallel, contributing to a nearly 5-fold glucose-induced increase in total protein synthesis (175). Translation of insulin and other secretory or cell membrane proteins takes place on ribosomes on the cytosolic surface of the ER. The newly formed proinsulin is directed into the ER as a single molecule of 110 amino acids; in the specialized ER environment the proin-

sulin molecule will form disulfide bonds and fold into its correct three-dimensional structure (169, 176). The marked nutrient-induced protein synthesis poses a burden on the ER, and minor changes in the insulin molecule that favor protein misfolding are sufficient to induce ER stress, progressive  $\beta$ -cell dysfunction and death, and early onset diabetes in mice (177, 178).

Like many other proteins targeted for secretion or expression on the cell surface, proinsulin and its converting enzymes require special maturation steps in the ER. Because synthesis of proinsulin may vary severalfold under physiological conditions,  $\beta$ -cells utilize the UPR homeostatic mechanism to balance the load posed by newly synthesized proteins against the ER capacity to properly fold them. Transducers, such as IRE1 $\alpha$  and PERK, total XBP1, and the chaperones BiP, GRP94, and oxygen-regulated protein (ORP) 150 are highly expressed in  $\beta$ -cells (105, 179–181). Compared with glucose-responsive insulin-producing MIN-6 cells, MIN-6 cells that lose the glucose-responsiveness of insulin synthesis have a marked decrease in the expression of ER chaperones, including GRP94, BiP, ERp29, and PDI (182). Similarly, in cultured primary rat islets, lowering glucose from 30 to 5 mM causes a rapid (>50% by 2 h) and parallel decline in insulin secretion and XBP1 mRNA splicing (181). Furthermore, deficiency in key UPR pathways, such as the PERK-eIF2 $\alpha$  branch, suffices to trigger  $\beta$ -cell dysfunction and death (105, 183) (see *Section IV.B*).

The steady-state eIF2 $\alpha$  phosphorylation results from a balance between phosphorylation, induced by PERK in response to the ER protein load, and dephosphorylation induced by GADD34/PP1 (Fig. 2). Glucose-induced protein translation in  $\beta$ -cells results from a rapid (within 15 min) dephosphorylation of eIF2 $\alpha$  by PP1 (184). On the other hand, prolonged (12–24 h) phosphorylation of eIF2 $\alpha$  causes  $\beta$ -cell dysfunction and death (128).

Transient (1–3 h) exposure of  $\beta$ -cells to high glucose (10–25 mM) induces phosphorylation and activation of IRE1 $\alpha$  (185). This effect requires glucose metabolism, but it is not accompanied by BiP dissociation from IRE1 $\alpha$  or by XBP1 splicing. Prevention of IRE1 $\alpha$  signaling by small interfering RNA decreases glucose-induced insulin biosynthesis, indicating that acute IRE1 $\alpha$  activation is required for proinsulin biosynthesis (185). Prolongation of the time of exposure to high glucose to 3–7 d, however, induces a protracted IRE1 $\alpha$  phosphorylation, which is accompanied by XBP1 splicing and progressive inhibition of insulin mRNA and protein expression (185). This decrease in insulin mRNA expression may also be secondary to mRNA degradation (66) (see *Section VI*).

These observations suggest that early activation of some components of the UPR, such as the PERK-eIF2 $\alpha$  and IRE1 $\alpha$  pathways, plays a physiological role in supporting proinsulin and total protein biosynthesis and in adapting the ER chaperone capacity to increased protein synthesis (181, 185). On the other hand, prolonged UPR activation may impair  $\beta$ -cell function and lead to apoptosis. The mechanisms for this transition from physiology to pathology remain to be clarified, but it may be related to XBP1 splicing (185) and to an IRE1-mediated degradation of insulin mRNA (66). The study of  $\beta$ -cell behavior after cessation of ER stress may shed

light on the mechanisms of recovery from an acute UPR (see Section VI).

#### IV. ER Stress and $\beta$ -Cell Death in Monogenic and Type 2 Diabetes

Autopsy data suggest that the early and progressive decline in insulin secretion in type 2 diabetes is accompanied by a decrease in  $\beta$ -cell mass and that this is secondary to increased  $\beta$ -cell apoptosis (21). The putative mechanisms involved in  $\beta$ -cell failure and death in type 2 diabetes have been reviewed extensively (4, 23–25). Among the potential factors contributing to progressive  $\beta$ -cell loss, glucose, FFA, and islet amyloid polypeptide (IAPP) have been implicated as triggers of  $\beta$ -cell ER stress. The most convincing evidence for the role of ER stress in  $\beta$ -cell failure and diabetes comes from rare genetic disorders.

##### A. ER stress and human diabetes

A mutation in EIF2AK3, encoding the human eIF2 $\alpha$  kinase (equivalent to rodent PERK), causes monogenic diabetes in Wolcott-Rallison syndrome, a rare disorder characterized by neonatal or early-infancy insulin-dependent diabetes (186). Epiphyseal dysplasia and developmental delay become apparent at later ages. The EIF2AK3 mutations identified so far result in a truncated or missense eIF2 $\alpha$  kinase with little or no activity (187). Autopsy findings include pancreatic hypoplasia and  $\beta$ -cell loss (188). This disease highlights the importance of the PERK-mediated ER stress response in the regulation of normal  $\beta$ -cell function and survival, at least in neonatal life; its importance for  $\beta$ -cells in adult life has been questioned (189).

In Wolfram syndrome, mutations in Wolfram syndrome gene 1 (WFS1), which encodes an ER Ca<sup>2+</sup> channel, lead to young-onset diabetes associated with selective  $\beta$ -cell loss, optic atrophy, sensorineural deafness, diabetes insipidus, and neurological manifestations (190).

Monogenic forms of diabetes may serve as “caricature” models for the identification of small effects of common gene variants in type 2 diabetes that have a polygenic and environmental cause (191–194). Genetic variation in the WFS1 gene has been associated with type 2 diabetes (195, 196). ATF6 has also been identified as a minor type 2 diabetes susceptibility gene in Pima Indians (197). In some cohorts, an association with insulin secretion was observed for a DNA variant that extends into the 5′ end of the ATF6 gene (198). Further studies are needed on the genetic variation in key UPR genes in type 2 diabetes and on possible gene–environment interactions.

More direct evidence for a role of ER stress in type 2 diabetes comes from a recent study by Laybutt *et al.* (199). Thus, a higher staining intensity was observed for BiP, CHOP, and p58<sup>IPK</sup> in  $\beta$ -cells from pancreatic sections of type 2 diabetic patients compared with nondiabetic pancreatic tissue (199), whereas another study demonstrated a 2-fold increase in ER size in  $\beta$ -cells from type 2 diabetic patients compared with nondiabetic patients (200). Increased staining for ATF3, downstream of eIF2 $\alpha$ -ATF4 (92), was also shown in insulin-positive cells in pancreatic sections of type 2 dia-

betic patients (201). Huang *et al.* (202) recently reported increased CHOP expression in  $\beta$ -cells from obese individuals, whether diabetic or not. In the pancreatic sections of diabetic patients, CHOP was found to be more frequently localized in the nucleus as opposed to the cytoplasmic presence of CHOP in obesity (202). Based on these findings, it was speculated that CHOP nuclear translocation is a discrete and necessary step for apoptosis induction, although there are no published data in other models of ER stress to support this hypothesis. The factor triggering nuclear CHOP translocation was suggested to be IAPP because adenovirus-mediated human IAPP expression in INS-1 cells increased CHOP expression and nuclear translocation and DNA fragmentation (202). Unfortunately, no additional ER stress markers were examined in this study. CHOP can be induced by a variety of cellular stresses, and amyloid precursor protein was shown to induce CHOP expression in neurons in the absence of an UPR (203). Extracellular IAPP oligomers induced heat shock protein 90 in MIN-6 cells and human islets, and mild XBP1 splicing in MIN-6 cells. Inhibition of the ubiquitin-proteasome pathway was implicated in the IAPP-induced  $\beta$ -cell apoptosis (204). A recent study of the expression of ER stress markers in islets isolated from type 2 diabetic organ donors showed no marked differences compared with control islets after 3- to 6-d culture at 5 mM glucose. The islets from diabetic donors, however, induced BiP and XBP1 expression markedly after an increase to 11 mM glucose, whereas this response was absent in islets from nondiabetic donors (200).

##### B. Animal models of ER stress and diabetes

In the Akita mouse, the C96Y mutation in insulin-2 prevents formation of one of the disulfide bonds between the A and B chains (177). The misfolded proinsulin accumulates in the ER, is complexed to BiP, and is eventually degraded. Despite the presence of normal insulin-1 and of one normal insulin-2 allele in the heterozygous Akita mouse, the animals develop diabetes due to progressive  $\beta$ -cell loss caused by ER stress. In heterozygous, but not homozygous, Akita mice, the homozygous disruption of CHOP delayed diabetes development by 8–10 wk (205), suggesting that the cell death mechanism is partially CHOP-dependent. A recent report describes the C95S mutation in insulin-2 in the Munich mouse, causing loss of the intra-A chain disulfide bond (178). This leads to insulinopenic glucose intolerance and severe diabetes in heterozygous and homozygous mice, respectively (178). A mouse model of Wolfram syndrome has also been established. Deletion of the WFS1 gene leads to diabetes as a result of  $\beta$ -cell ER stress and apoptosis (206, 207). The WFS1 gene product is an ER Ca<sup>2+</sup> channel induced during ER stress. It exerts an inhibitory effect on IRE1 $\alpha$ , PERK, and ATF6 (208), thereby constituting another feedback loop to tone down the UPR. These observations indicate that both deficient and exaggerated responses to ER stress result in  $\beta$ -cell loss and diabetes.

Mice with a PERK deletion cannot phosphorylate eIF2 $\alpha$  and attenuate insulin translation, and they develop diabetes within a few weeks after birth due to progressive  $\beta$ -cell loss (105, 106). As in Wolcott-Rallison syndrome, the

mice exhibit skeletal dysplasia, postnatal growth retardation, and exocrine pancreas insufficiency. To identify the cause of diabetes in PERK-deficient mice, Zhang *et al.* (189) generated diverse tissue- and cell-specific PERK-knockout mice and observed that PERK is of particular relevance for the fetal and early neonatal development of  $\beta$ -cell mass and function. Mice homozygous for a Ser51Ala substitution in eIF2 $\alpha$ , precluding its phosphorylation by PERK or other kinases, die of hypoglycemia within hours after birth because of defective gluconeogenesis. The pancreas from these mice exhibits  $\beta$ -cell defects and insulin depletion at late embryonic and neonatal stages (209). These animal models show that lack of PERK-eIF2 $\alpha$  signaling in  $\beta$ -cells is detrimental by hampering their ability to down-regulate insulin synthesis and thus adapt it to the prevailing ER protein handling capacity. The PERK-eIF2 $\alpha$  pathway undergoes feedback inhibition via GADD34/PP1-mediated eIF2 $\alpha$  dephosphorylation (95), and perhaps also by up-regulation of p58<sup>IPK</sup>, an ER-resident cochaperone (100, 101, 79). p58<sup>IPK</sup>-null mice develop diabetes as they reach adult age due to increased  $\beta$ -cell apoptosis (210). Although mice homozygous for a Ser51Ala substitution in eIF2 $\alpha$  die shortly after birth, the heterozygotes are phenotypically normal. Challenged with a high-fat diet, however, the heterozygous Ser51Ala mice develop glucose intolerance (183). This is due to decreased islet insulin content and lesser nutrient-stimulated insulin secretion. In the  $\beta$ -cells, the ER appeared dilated, and increased amounts of proinsulin were bound to BiP, suggesting delayed proinsulin processing (183). In islets obtained from 10- to 12-wk-old diabetic db/db mice (which have a defective leptin receptor), ER stress markers were increased compared with control islets (199). There was more eIF2 $\alpha$  phosphorylation; ATF4, CHOP, and p58<sup>IPK</sup> expression; and increased XBP1 splicing and BiP, GRP94, and ERp72 expression (199). Increased XBP1s expression may indicate "pathological"  $\beta$ -cell ER stress (185), reinforcing the idea that ER dysfunction contributes to the  $\beta$ -cell loss. It is not known whether ER stress is present in db/db islets in the prediabetic phase. A 4-wk treatment of db/db mice with exendin-4, a glucagon-like peptide 1 receptor agonist, led to a significant decrease in nuclear CHOP expression in  $\beta$ -cells and whole pancreas XBP1s levels, in parallel to a reduction in hyperglycemia (211). Interestingly, exendin-4 also protected  $\beta$ -cells *in vitro* against the synthetic ER stressors thapsigargin and tunicamycin (211). In these *in vitro* studies, however, this protection occurred in parallel to increased PERK and IRE1 $\alpha$  signaling and with enhanced expression of ATF4, CHOP, and XBP1s. It was suggested that the resulting GADD34 induction (GADD34 is regulated by CHOP) and PP1c activation mediated the eIF2 $\alpha$  dephosphorylation observed with exendin-4 and forskolin, thereby attenuating the ER stress response and allowing recovery of translational repression (211). Exendin-4 treatment also improved the glycemia of  $\beta$ -cell-specific calmodulin-overexpressing mice, which lose  $\beta$ -cells by apoptosis induced by nitric oxide (NO) production and ER stress (212, 213). In these animals, exendin-4 reduced BiP and CHOP expression and augmented islet insulin content (213).

### C. Lipotoxicity and glucotoxicity as triggers of ER stress—when physiology turns into pathology

A high-fat diet and/or obesity may contribute to the development of type 2 diabetes by causing  $\beta$ -cell lipotoxicity and insulin resistance. FFAs activate an ER stress response in  $\beta$ -cells, with palmitate being more potent than oleate (128, 199, 214, 215). Palmitate leads to phosphorylation of PERK and eIF2 $\alpha$ , inhibition of protein synthesis, and induction of ATF4 and CHOP (128, 215) (Fig. 3). CHOP induction by FFA is mediated by ATF4 binding to the C/EBP-ATF binding site in the CHOP promoter, as well as by c-Fos and Jun-B dimer binding to the activator protein-1 (AP-1) binding site (93). Palmitate also activates IRE1 (as evidenced by XBP1 splicing) and ATF6 (214) and up-regulates ER chaperones including BiP, GRP94, p58<sup>IPK</sup>, ORP150, ERp72, Dnajb9, Herp, and Edem (128, 199, 214), although BiP induction was not observed in one study (215). Oleate does not activate the PERK pathway and is less effective in activating IRE1 $\alpha$ , but it does induce ER chaperone expression (128, 214). That ER stress contributes to palmitate-induced  $\beta$ -cell apoptosis is supported by the observation that MIN-6 cells overexpressing BiP have a milder ER stress response and are partially protected against palmitate-induced apoptosis (199). The molecular mechanism by which FFA-induced ER stress causes  $\beta$ -cell apoptosis is not well understood. Because previous observations suggested that defective PERK-eIF2 $\alpha$  activation contributes to  $\beta$ -cell death (209, 216–218), attempts were made to protect  $\beta$ -cells against FFA with salubrinal (128), a selective inhibitor of eIF2 $\alpha$  dephosphorylation (126) (Fig. 3). Unexpectedly, salubrinal-induced eIF2 $\alpha$  phosphorylation was proapoptotic in  $\beta$ -cells, and it specifically potentiated the deleterious effects of oleate and palmitate, but not of other ER stressors, through a synergistic activation of the PERK-eIF2 $\alpha$  branch (128). The percentage of apoptosis in  $\beta$ -cells exposed to FFA increased by 3- to 6-fold in the presence of salubrinal, whereas no such potentiation was seen with cytokines, which also trigger ER stress (128) (see Section V), or the synthetic ER stressors cyclopiazonic acid (CPA) and thapsigargin (128). ER stress-mediated apoptosis in  $\beta$ -cells therefore seems to depend on both the ER stressor and the magnitude and duration of eIF2 $\alpha$  phosphorylation and activation of downstream events. Both deficient and chronic excessive eIF2 $\alpha$  phosphorylation are poorly tolerated by  $\beta$ -cells and trigger the apoptotic program.

High glucose (30 mM) also induced a modest (around 2-fold) activation of the UPR in cultured rat islets, triggering XBP1 splicing, expression of the ER chaperones BiP, GRP94, and Edem, and of PERK-dependent ATF3, CHOP, and GADD34 (181). This did not depend on Ca<sup>2+</sup> influx or insulin release by the  $\beta$ -cells because this response was not affected by diazoxide (which opens the  $\beta$ -cell's ATP-dependent K<sup>+</sup> channels and thereby reduces Ca<sup>2+</sup> influx and insulin release) or by clonidine (which inhibits Ca<sup>2+</sup> influx) (181). The regulation of CHOP expression by glucose in  $\beta$ -cells is mediated by the MAPK ERK1 and 2 (219). It remains to be determined whether high glucose potentiates FFA-induced  $\beta$ -cell ER stress.



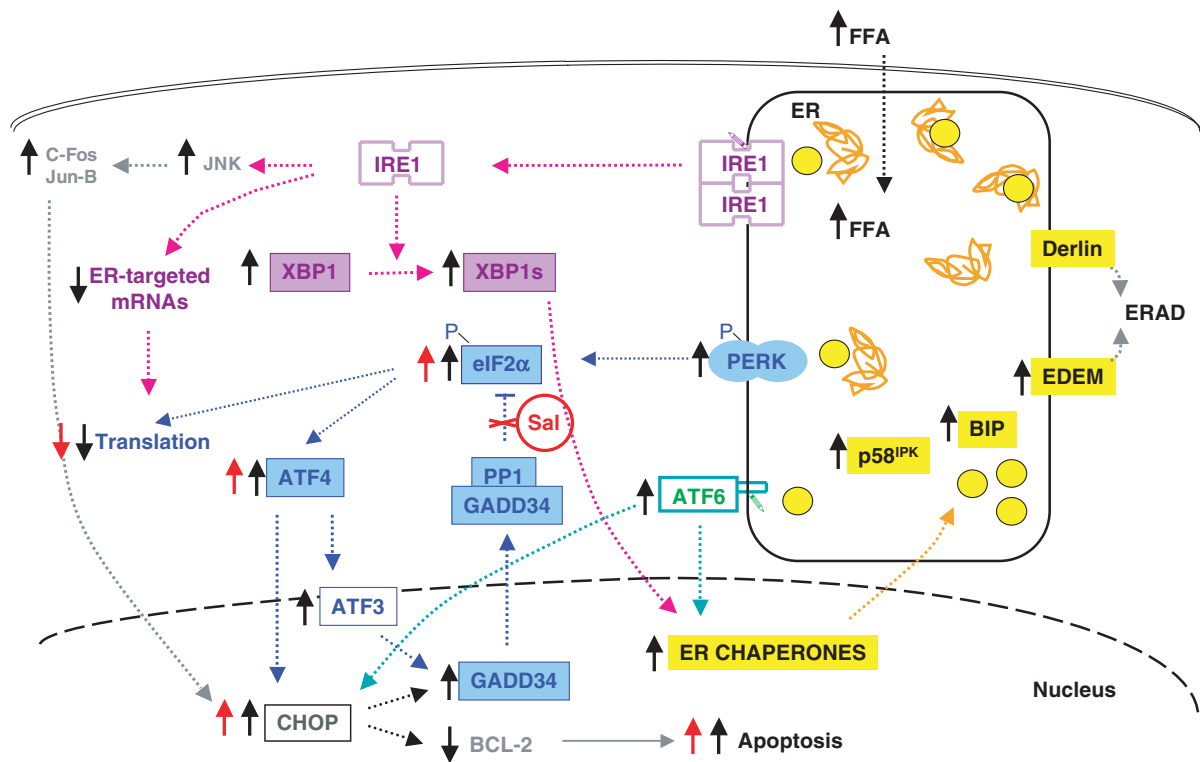

FIG. 3. FFA-induced ER stress response in  $\beta$ -cells. FFA effects are indicated by short black arrows and salubrinal potentiation by short red arrows. Palmitate and, to a lesser extent, oleate activate IRE1 $\alpha$ , and both FFAs activate ATF6. The activation of PERK is observed only with palmitate. ATF6 and XBP1s increase ER chaperone expression, which may be beneficial for cell survival. IRE1 activates JNK and leads to formation of c-Fos/Jun-B AP-1 dimers, which will induce CHOP together with ATF4. The induction of CHOP or other downstream effectors of the PERK-eIF2 $\alpha$  branch is probably proapoptotic because the potentiated activation of this pathway by salubrinal (sal), a selective inhibitor of eIF2 $\alpha$  dephosphorylation, much increases FFA-induced  $\beta$ -cell apoptosis (128). Additional information and supporting references are provided in the text. EDEM, ER degradation enhancing  $\alpha$ -mannosidase-like protein.

### V. ER Stress and $\beta$ -Cell Death in Type 1 Diabetes—the Role of Cytokines and Nitric Oxide (NO)

In type 1 diabetes,  $\beta$ -cell death precedes massive T cell infiltration in nonobese diabetic (NOD) mice (220) and insulin-dependent diabetes mellitus rats (221). In both animal models and human type 1 diabetes,  $\beta$ -cell apoptosis coincides with expression of cytokines such as IL-1 $\beta$ , interferon (IFN)- $\gamma$ , and TNF- $\alpha$  by the infiltrating immune cells, and inducible NO synthase (iNOS) by both  $\beta$ -cells and immune cells (2, 221, 222), suggesting that these are early mediators of  $\beta$ -cell death. Under *in vitro* conditions, IL-1 $\beta$  and/or TNF- $\alpha$ , in combination with IFN- $\gamma$ , induce NO production, severe functional suppression, and death of  $\beta$ -cells (2, 223–225). Cytokine-induced death in human, rat, and mouse  $\beta$ -cells, and in insulin-producing cell lines, occurs mostly by apoptosis (2, 25, 226), but there is also a minor NO-dependent necrotic component in rodent  $\beta$ -cells (227). Cytokine-triggered  $\beta$ -cell apoptosis is regulated by complex gene networks under the control of the key transcription factors NF- $\kappa$ B and STAT-1 (25, 228–233).

One of the cytokine-induced and NF- $\kappa$ B-regulated genes in  $\beta$ -cells is iNOS, leading to massive NO formation (2, 234). The chemical NO donor SNAP depletes ER Ca<sup>2+</sup> in MIN-6 cells (180). Because Ca<sup>2+</sup> is required for the protein binding and chaperoning ability of ER chaperones, severe ER Ca<sup>2+</sup> depletion will impair the quality of ER protein folding and

assembly (78) and trigger CHOP expression and apoptosis (180). IL-1 $\beta$  plus IFN- $\gamma$ , via NO synthesis, decrease the expression of SERCA in primary  $\beta$ -cells and insulin-producing INS-1E cells, depleting ER Ca<sup>2+</sup> stores (235). Inhibition of SERCA by the chemicals thapsigargin and CPA also triggers ER stress and apoptosis in  $\beta$ -cells, and these cells are more sensitive than fibroblasts to the proapoptotic effects of SERCA inhibition (235, 236). IL-1 $\beta$  and IFN- $\gamma$  induce diverse components of the ER stress response, including activation of IRE1 $\alpha$ , as observed by XBP1 splicing, and of eIF2 $\alpha$ /ATF4/CHOP/Bim, but not ATF6 (93, 229, 230, 235) (Fig. 4). In line with the deficient ATF6 activation by IL-1 $\beta$  and IFN- $\gamma$ , the cytokines failed to increase BiP expression (235). It is conceivable that this deprives the  $\beta$ -cells of an important mechanism for cell survival during ER stress, which could contribute to their susceptibility to cytokine- and NO-mediated apoptosis. That ER stress contributes to cytokine-induced cell death is supported by the recent finding that insulin-producing NIT-1 cells overexpressing BiP have a decreased CHOP induction and are partially protected against apoptosis induced by IL-1 $\beta$  and IFN- $\gamma$  or cytotoxic T lymphocytes (237). In neuronal cells, NO induces s-nitrosylation and inhibition of PDI (238), thereby hampering proper protein folding and aggravating the ER stress (239). It remains to be tested whether NO has similar effects on PDI in  $\beta$ -cells. Interestingly, low concentrations of NO, as induced by ac-

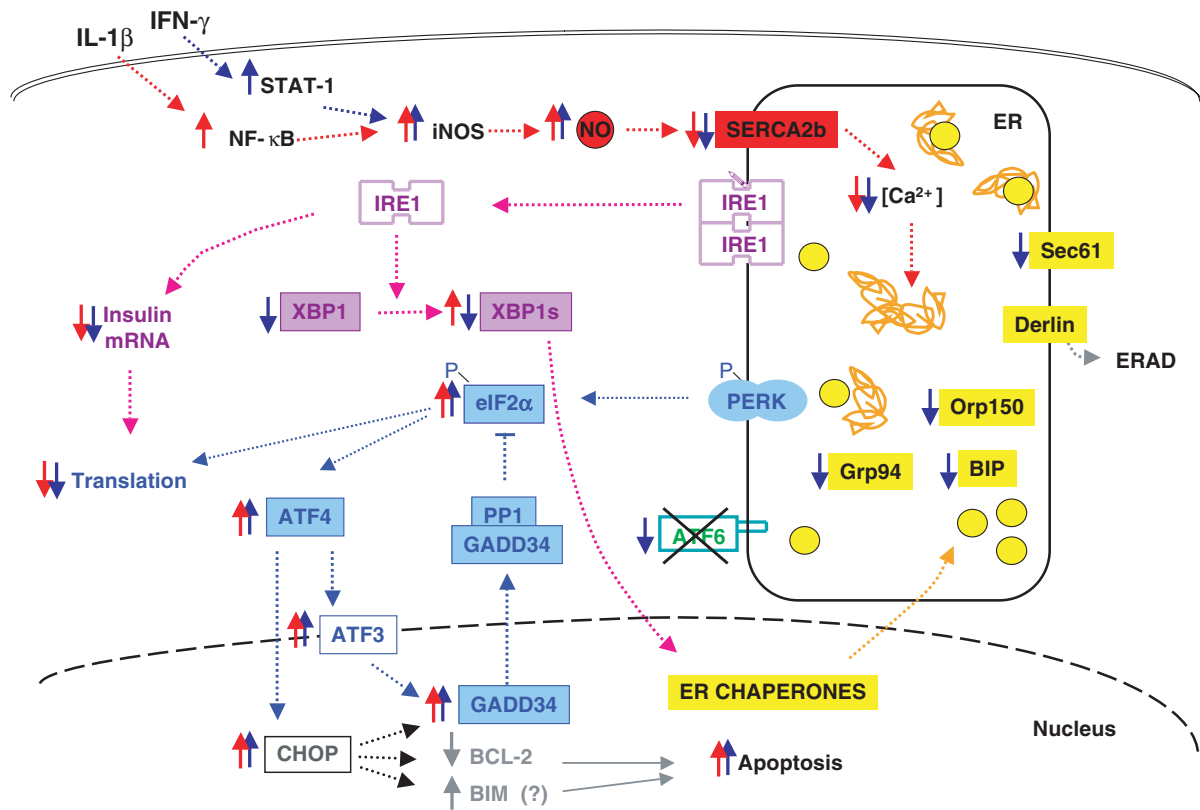

FIG. 4. Cytokine-induced ER stress response in  $\beta$ -cells. Effects of IL-1 $\beta$  are indicated by *short red arrows*, and those of IFN- $\gamma$  by *short blue arrows* (IFN- $\gamma$  alone does not up-regulate iNOS or ER stress markers, but it potentiates the effects of IL-1 $\beta$ ). IL-1 $\beta$  and IFN- $\gamma$  up-regulate iNOS in an NF- $\kappa$ B- and STAT-1-dependent manner, leading to NO accumulation. NO decreases SERCA2b expression and depletes ER Ca<sup>2+</sup> stores. This leads to ER stress and activation of IRE1 $\alpha$  and PERK, but not ATF6. The lack of ATF6 activation by IL-1 $\beta$  and the down-regulation of some components of the UPR and XBP1 splicing by IFN- $\gamma$  result in unchanged or decreased ER chaperone expression. IRE1 $\alpha$  degrades insulin-1 and -2 mRNAs, decreasing the ER protein load. eIF2 $\alpha$  activation and ATF4 up-regulation contribute to CHOP induction. A prolonged cytokine-induced ER stress response may impair  $\beta$ -cell function and defense mechanisms, thereby tilting the balance between protective and detrimental effects of the UPR in the direction of apoptosis. Additional information and supporting references are provided in the text.

tivation of constitutive NOS by glucose, protect against ER stress by dissipating ROS (240), suggesting that the effects of NO on  $\beta$ -cell ER stress are concentration- and time-dependent.

IL-1 $\beta$  alone induces ER stress but fails to induce  $\beta$ -cell death, whereas IFN- $\gamma$  by itself causes neither but it potentiates IL-1 $\beta$ - or CPA-induced cell death (2, 25, 235, 241). Treatment with IFN- $\gamma$  decreases expression of XBP1s mRNA, several ER chaperones (BiP, GRP94, and ORP150, but not calnexin/calreticulin), and Sec61 $\alpha$ , while augmenting CHOP and ATF-4 expression (241, 242). By decreasing ER chaperones, and thus protein folding and Ca<sup>2+</sup> storage capacity (78), IFN- $\gamma$  decreases  $\beta$ -cell defense against ER stress and favors the proapoptotic signals, such as CHOP and other ATF4-dependent genes. Other potential mechanisms by which IFN- $\gamma$  synergizes with IL-1 $\beta$  to induce  $\beta$ -cell apoptosis are augmentation of IL-1 $\beta$ -induced iNOS expression (2, 234) and stimulation of expression of major histocompatibility complex classes I and II and of other components of the antigen processing machinery (242); because the MHC complex is assembled in the ER, this may contribute to the ER overload (243).

Activation of CHOP transcription after  $\beta$ -cell exposure to palmitate or cytokines depends on the binding of ATF4 and AP-1 to the CHOP promoter, but these two treatments induce

formation of different AP-1 dimers (c-Fos and c-Jun and/or Jun-B in the case of cytokines, and c-Fos and Jun-B for palmitate) at different time points (93). In line with this, cytokines, but not palmitate, induce Ser-63 phosphorylation of c-Jun. CPA, but not cytokines or palmitate, activates the CHOP promoter via ER stress response element (93). These observations suggest that different pathways of the UPR are triggered in  $\beta$ -cells depending on the source and intensity of the ER stressor. The fate of the  $\beta$ -cells, death or survival, will depend on the balance between the ER stress and the UPR pathway(s) activated, their time course and intensity, and the adequacy of other  $\beta$ -cell defense mechanisms, such as the scavenging of ROS. Once the balance tilts for apoptosis, JNK, ATF3, and CHOP are potential mediators of  $\beta$ -cell death (180, 201).

Evidence for human islet ER stress exists for type 2 diabetes (199, 202), but this remains to be proven for type 1 diabetes. Compared with rat  $\beta$ -cells, NO is of less importance for cytokine-induced human  $\beta$ -cell death (244), and islet cells from iNOS<sup>-/-</sup> mice are only partially protected against cytokines (227, 245), pointing to non-NO (and putatively non-ER stress) cell death mechanisms (246) in human type 1 diabetes. Histological exam of autopsy material from eight type 1 diabetic patients (five with recent onset of diabetes and

three with long-standing disease) failed to show increased nuclear or cytosolic CHOP expression (202). These data should, however, be interpreted with caution. CHOP activation is only one among several markers of ER stress; on one hand, this protein can be activated in  $\beta$ -cells by toxic stimuli unrelated to ER stress, *e.g.*, after exposure to toxic doses of streptozotocin or other alkylating agents (133), and on the other hand cell populations adapted to chronic ER stress can maintain an activated UPR without displaying up-regulation of downstream genes such as CHOP (247). Furthermore, the pattern of islet infiltration and destruction is nonuniform in type 1 diabetes, suggesting that expression of  $\beta$ -cell ER stress markers should be evaluated in correlation with local infiltration by T cells and macrophages (which was not done in this study). For instance, expression of ATF3, another potentially proapoptotic gene regulated by ATF4, is present in  $\beta$ -cells adjacent to infiltrating lymphocytes in NOD mice, but not in  $\beta$ -cells away from the lymphocytes (201). Increased expression of ATF3 was also detected in  $\beta$ -cells from type 1 diabetic patients, but not in islets from nondiabetic individuals (201). ER stress may contribute to  $\beta$ -cell death in the early stages of the immune assault—which are probably cytokine-dependent (2)—but be less relevant after clinical diabetes onset, when other mechanisms predominate and there remain only “surviving”  $\beta$ -cells, which may be a selected cell population. Additional studies are required to define the extent of the ER stress and non-ER stress contributions to  $\beta$ -cell death in experimental models and human type 1 diabetes. These studies should ideally utilize more specific markers for ER stress, such as IRE1 activation, XBP1 splicing, BiP overexpression, and ATF6 activation and examine material from both prediabetic and diabetic patients, correlating local immune infiltration with expression of  $\beta$ -cell ER stress markers.

## VI. $\beta$ -Cell Recovery from ER Stress

As discussed above,  $\beta$ -cells are sensitive to ER stress, but this vulnerability is relative. Assuming that increased functional load *in vivo* augments the UPR in human  $\beta$ -cells, as suggested by increased CHOP expression in  $\beta$ -cells from obese nondiabetic patients (autopsy material) (202), it is remarkable that most obese individuals cope with decades of insulin resistance without developing  $\beta$ -cell failure and diabetes. Furthermore, islet cells surviving a 48-h exposure to IL-1 $\beta$  *in vitro* (248) or exposure to the autoimmune assault in NOD mice *in vivo* (249, 250) are able to recover function after an additional 6-d in culture without the cytokine (248) or the T cells (249, 250), and  $\beta$ -cells exposed for up to 12 h to a severe CPA-induced ER stress do not reach “the point of no return” for cell death (66). A time course microarray analysis in INS-1E cells exposed to CPA for up to 12 h, including an additional group of cells treated for 6 h and then allowed to recover without CPA for 3 h (66), indicated that the two groups of genes most affected by CPA were those related to cellular responses to ER stress, which were up-regulated, and those related to differentiated  $\beta$ -cell functions, which were down-regulated. After a 3-h recovery period, most genes returned to control levels, as for instance the proapoptotic

transcription factors ATF3 and CHOP, whereas expression of the ER chaperones BiP and GRP94 remained elevated. This pattern of gene expression is probably due to the longer half-life of chaperones such as BiP, compared with proapoptotic genes such as CHOP (247), and may explain why  $\beta$ -cells can endure 12 h of severe ER stress without reaching the point of no return for cell death. The most marked inhibitory effect of CPA was on the expression of mRNAs for insulin-1 and -2. Similar findings were observed in INS-1E and primary  $\beta$ -cells exposed to thapsigargin or IFN- $\gamma$  plus IL-1 $\beta$  (66). ER stress induces a rapid degradation of mRNAs targeted for translation at the ER in *Drosophila* cells (65). This degradation is mediated by IRE1 $\alpha$  and complements other UPR mechanisms by decreasing production of nonvital proteins at the ER. The CPA-induced early degradation of insulin-1 and -2 occurred in parallel to IRE1 activation and in the absence of altered insulin promoter activity (66). It is conceivable that degradation of insulin mRNA, the most prevalent ER-targeted mRNA in  $\beta$ -cells, alleviates functional demand on the ER. This, together with an up-regulation of ER chaperones and down-regulation of proapoptotic genes, may contribute to  $\beta$ -cell survival once the source of ER stress is removed.

## VII. ER Stress as a Putative Link between Obesity and Insulin Resistance

ER stress has been proposed as one of the molecular mechanisms linking obesity with insulin resistance and might thus be a common molecular pathway for the two main causes of type 2 diabetes, namely insulin resistance and  $\beta$ -cell loss. Since 2004, several papers were published on ER stress and insulin signaling, mostly in rodent liver, and the subject has been discussed in a series of reviews (251–255).

### A. Liver

In high-fat-fed and ob/ob (leptin-deficient) mice, markers for ER stress (PERK and eIF2 $\alpha$  phosphorylation and BiP expression) are increased in liver and fat (256) but not in muscle, which is the main site of glucose disposal. Synthetic ER stressors impaired proximal insulin signaling in hepatoma cells, increasing serine and decreasing tyrosine phosphorylation of insulin receptor substrate (IRS) 1 and reducing Akt phosphorylation (256). The alterations in the insulin signaling cascade were dependent on JNK activation, previously shown to mediate insulin resistance (257). ER stress and JNK activation were shown to increase glucose-6-phosphatase activity and glucose output in primary hepatocytes (258). IRE1 activation mediated this suppression of insulin signaling, probably through TRAF2 recruitment and JNK activation (120), but increasing cellular XBP1s levels had the inverse effect and favored insulin signaling (256). Conversely, XBP1-deficient fibroblasts, which are more sensitive to ER stress, exhibited impaired insulin signaling. XBP1<sup>+/-</sup> mice placed on a high-fat diet developed greater insulin resistance and glucose intolerance compared with high-fat-fed XBP1<sup>+/+</sup> mice, and this correlated with increased PERK, c-Jun, and IRS-1 serine phosphorylation and decreased tyrosine phosphorylation of the insulin receptor, IRS-1 and

IRS-2, in liver and fat (256). ER stress can also lead to NF- $\kappa$ B activation (122, 123, 259, 260). It is possible that ER stress activates IKK- $\beta$  and NF- $\kappa$ B signaling in the liver (261), thereby inducing proinflammatory cytokines and consequently insulin resistance (262, 263). The study by Ozcan *et al.* (256) did not address how obesity induces ER stress signaling, but it can be speculated that it is lipid mediated. Thus, ER stress and insulin resistance were detected in high-fat-fed XBP1<sup>+/-</sup> mice but not in those fed normal chow. Saturated FFA were shown to induce sustained JNK activation and insulin resistance in hepatocytes both *in vitro* and when perfused into the liver *in vivo*, whereas hyperglycemia had no such effect (264).

In rats, sucrose- and saturated fat-enriched diets induced steatosis, characterized by increased liver content in saturated fatty acids, hepatic ER stress marker expression, and caspase 3 activation. In contrast, polyunsaturated fat diets that induce steatosis without increased liver accumulation of saturated fat, did not induce hepatic XBP1 splicing, BiP expression, or liver injury (265). The induction of ER stress and steatosis in rats fed the sucrose- and saturated fat-enriched diets occurred early (after 1 wk on the diet), before obesity and independently of changes in insulin action. The accumulation of saturated fat probably triggers the ER stress response, and ER stress may reciprocally contribute to steatosis through the activation of sterol-response element-binding proteins (SREBP). Under normal circumstances, cholesterol deprivation leads to SREBP migration from the ER to the Golgi apparatus where SREBP are proteolytically activated by S1P and S2P (266), similar to the mechanism of ATF6 activation (267), and induce lipogenic genes. ER stress also activates SREBP in hepatocytes exposed to homocysteine and thereby induces cholesterol and triglyceride synthesis and steatosis (268), whereas BiP overexpression inhibits SREBP activation and expression of its downstream genes (268). In rat islets, synthetic ER stressors also activate SREBP, and this was suggested to contribute to  $\beta$ -cell glucolipotoxicity (269).

Increased BiP expression was also detected in the liver of obese db/db (leptin receptor-deficient) mice (270), although low ER chaperone expression levels were observed in these mice in another study (271). In the db/db mice, hepatic overexpression of the ER chaperone ORP150 was induced with a sense ORP150-encoding adenovirus (270). The glycemia of these mice decreased already 2 d after viral injection. Two weeks later, their insulin sensitivity and glucose tolerance had improved and hepatic glucose output was suppressed as a result of improved insulin signaling and decreased expression of the key gluconeogenic enzymes phosphoenolpyruvate carboxykinase and glucose-6-phosphatase. Conversely, antisense ORP150 virus administration in wild-type mice resulted in loss of IRS-1 tyrosine phosphorylation and increased gluconeogenesis and insulin resistance (270). Further evidence for the role of ORP150 in regulating insulin sensitivity comes from a study in which ORP150<sup>+/-</sup> or systemic ORP150 transgenic mice were crossed with heterozygous Akita mice. Heterozygous ORP150 deficiency in Akita mice impaired glucose tolerance, which was related to decreased insulin action possibly due to increased sensitivity to hyperglycemia-induced oxidative stress (272). Akita mice overexpressing ORP150 (around

2-fold increase in pancreas and fat, 3-fold in liver, and 8-fold in muscle) had improved glucose tolerance, due to improved insulin sensitivity, but  $\beta$ -cell-specific ORP150 overexpression (under the rat insulin promoter) did not improve glucose levels (272). It is conceivable that overexpression of specific ER chaperone(s) may be beneficial in one cell type and without effect, or perhaps even detrimental, in another.

Another approach to ameliorate insulin resistance by targeting ER stress has been the use of chemical chaperones, low molecular weight osmolytes that stabilize proteins and improve their folding in and export from the ER (273). Treatment of ob/ob mice with the chemical chaperones 4-phenyl butyric acid and taurine-conjugated ursodeoxycholic acid improved insulin sensitivity and glycemia within 10 d of treatment through decreased hepatic glucose production and greater glucose disposal in muscle and fat (274). The chaperones alleviated ER stress, decreasing PERK and IRE1 phosphorylation, reduced c-Jun phosphorylation by JNK, and improved insulin signaling as shown by increased tyrosine phosphorylation of the insulin receptor, IRS-1 and IRS-2, in liver and fat (274).

### B. Adipose tissue

Recent data suggest that hypoxia in adipose tissue of obese mice contributes to the induction of ER stress and thereby affects adipokine production (275). CHOP and BiP were increased and adiponectin expression was decreased in adipose tissue from high-fat-fed and KKAY mice. This was replicated *in vitro* in hypoxia-exposed adipocytes, and interference with CHOP expression partially reversed the decrease in adiponectin mRNA levels (275). Evidence for a role of ER stress in human tissue is presently not available, but increased expression and phosphorylation of stress-activated kinases such as p38 and JNK were detected in omental, but not sc, fat from obese women compared with lean controls (276). Although there was no change in serine or insulin-stimulated tyrosine phosphorylation of IRS-1 in the omental fat tissue, the activation of the stress kinases correlated with the patients' glucose levels and insulin resistance.

## VIII. Future Areas of Research

The UPR was discovered nearly 20 yr ago, the first indications that ER stress might contribute to diabetes were published 6–7 yr ago, and there has been an exponential growth in the field since then. As presently reviewed, it seems possible that ER stress and the UPR have physiological and pathophysiological roles in  $\beta$ -cells and insulin signaling. We should keep in mind, however, that the mechanisms causing  $\beta$ -cell dysfunction and death in diabetes are complex (25), and ER stress is probably only one of several factors contributing to  $\beta$ -cell loss in diabetes. ER stress also seems to play a role in high fat- and obesity-induced insulin resistance in liver, at least in rodent models. Its role in adipose tissue is not well documented yet, and, from currently available data, ER stress does not seem to play a role in muscle insulin resistance. In conclusion, time and the accumulation of novel experimental data will confirm or disprove the hypothesis

that ER stress contributes to the pathogenesis of diabetes and other chronic degenerative diseases.

We outline below some of the areas where future research may contribute to clarify the role for ER stress in diabetes:

1) Are there additional components of the UPR/ER stress response with an important role for the regulation/dysregulation of insulin biosynthesis and release?

2) Which are the mechanisms by which chronic exposure to FFA and/or high glucose trigger an ER stress response?

3) Is ER stress relevant for  $\beta$ -cell death in human type 1 diabetes? Studies on human and mouse islets, and on histological preparations from type 1 diabetic patients and rodent models of autoimmune diabetes are required to clarify whether there is indeed a role for ER stress in type 1 diabetes.

4) How does IFN- $\gamma$  inhibit ER chaperones? Are there common and novel binding sites in the promoter region of these genes for IFN- $\gamma$ -induced transcription factors?

5) Which are the downstream mediators of ER stress-induced  $\beta$ -cell death? Are these mediators different for FFA and cytokines, or is there a “final common” pathway for  $\beta$ -cell death?

6) Is apoptosis the only form of ER stress-induced  $\beta$ -cell death, or is there a role for autophagy?

7) Is it possible to boost  $\beta$ -cell defenses against ER stress without affecting their exquisite ability to sense glucose and release insulin?

8) Is there a role for the UPR in the physiology of adipocytes and hepatocytes, as recently suggested for the  $\beta$ -cells?

9) Does ER stress play a role for insulin resistance in human type 2 diabetes? If yes, which are the tissues involved?

### Acknowledgments

Received May 29, 2007. Accepted November 6, 2007.

Address requests for reprints to: Dr. Décio L. Eizirik, Laboratory of Experimental Medicine, Université Libre de Bruxelles, Route de Lennik, 808-CP-618, 1070 Brussels, Belgium. E-mail: deizirik@ulb.ac.be

Work by the authors of this article was supported by grants from the European Union (Integrated Project EuroDia LSHM-CT-2006-518153 and STREP Savebeta, contract no. 036903; in the Framework Programme 6 of the European Community), the Fonds National de la Recherche Scientifique (FNRS), Fonds de la Recherche Scientifique Médicale (FRSM), Actions de Recherche Concertées de la Communauté Française, Belgium, and the Juvenile Diabetes Foundation International (JDRF). A.K.C. is a research associate of the FNRS, Belgium.

Disclosure Statement: The authors have nothing to disclose.

### References

- American Diabetes Association 1997 Report of the expert committee on the diagnosis and classification of diabetes mellitus. *Diabetes Care* 20:1183–1197
- Eizirik DL, Mandrup-Poulsen T 2001 A choice of death—the signal-transduction of immune-mediated  $\beta$ -cell apoptosis. *Diabetologia* 44:2115–2133
- Mathis D, Vence L, Benoist C 2001  $\beta$ -Cell death during progression to diabetes. *Nature* 414:792–798
- Rhodes CJ 2005 Type 2 diabetes—a matter of  $\beta$ -cell life and death? *Science* 307:380–384
- Kahn SE, Hull RL, Utzschneider KM 2006 Mechanisms linking obesity to insulin resistance and type 2 diabetes. *Nature* 444:840–846
- Gillespie KM 2006 Type 1 diabetes: pathogenesis and prevention. *CMAJ* 175:165–170
- Kahn SE 2001 Clinical review 135: the importance of  $\beta$ -cell failure in the development and progression of type 2 diabetes. *J Clin Endocrinol Metab* 86:4047–4058
- Weyer C, Bogardus C, Mott DM, Pratley RE 1999 The natural history of insulin secretory dysfunction and insulin resistance in the pathogenesis of type 2 diabetes mellitus. *J Clin Invest* 104:787–794
- Festa A, Williams K, D’Agostino Jr R, Wagenknecht LE, Haffner SM 2006 The natural course of  $\beta$ -cell function in nondiabetic and diabetic individuals: the Insulin Resistance Atherosclerosis Study. *Diabetes* 55:1114–1120
- Cnop M, Vidal J, Hull RL, Utzschneider KM, Carr DB, Schraw T, Scherer PE, Boyko EJ, Fujimoto WY, Kahn SE 2007 Progressive loss of  $\beta$ -cell function leads to worsening glucose tolerance in first-degree relatives of subjects with type 2 diabetes. *Diabetes Care* 30:677–682
- Porte Jr D 1991 Banting lecture 1990.  $\beta$ -Cells in type II diabetes mellitus. *Diabetes* 40:166–180
- Cerasi E, Neshler R, Gadot M, Gross D, Kaiser N 1995 Insulin secretion in obese and non-obese NIDDM. *Diabetes Res Clin Pract* 28 Suppl:S27–S37
- Grant SF, Thorleifsson G, Reynisdottir I, Benediktsson R, Manolescu A, Sainz J, Helgason A, Stefansson H, Emilsson V, Helgadóttir A, Styrkarsdóttir U, Magnusson KP, Walters GB, Palsdóttir E, Jonsdóttir T, Gudmundsdóttir T, Gylfason A, Saemundsdóttir J, Wilensky RL, Reilly MP, Rader DJ, Bagger Y, Christiansen C, Gudnason V, Sigurdsson G, Thorsteinsdóttir U, Gulcher JR, Kong A, Stefansson K 2006 Variant of transcription factor 7-like 2 (TCF7L2) gene confers risk of type 2 diabetes. *Nat Genet* 38:320–323
- Saxena R, Voight BF, Lyssenko V, Burtt NP, de Bakker PI, Chen H, Roix JJ, Kathiresan S, Hirschhorn JN, Daly MJ, Hughes TE, Groop L, Althuler D, Almgren P, Florez JC, Meyer J, Ardlie K, Bengtsson Bostrom K, Isomaa B, Lettre G, Lindblad U, Lyon HN, Melander O, Newton-Cheh C, Nilsson P, Orho-Melander M, Rastam L, Speliotes EK, Taskinen MR, Tuomi T, Guiducci C, Berglund A, Carlson J, Gianniny L, Hackett R, Hall L, Holmkvist J, Laurila E, Sjogren M, Sterner M, Surti A, Svensson M, Svensson M, Tewhey R, Blumensiel B, Parkin M, Defelice M, Barry R, Brodeur W, Camarata J, Chia N, Fava M, Gibbons J, Handsaker B, Healy C, Nguyen K, Gates C, Sougnez C, Gage D, Nizzari M, Gabriel SB, Chirm GW, Ma Q, Parikh H, Richardson D, Ricke D, Purcell S 2007 Genome-wide association analysis identifies loci for type 2 diabetes and triglyceride levels. *Science* 316:1331–1336
- Scott LJ, Mohlke KL, Bonnycastle LL, Willer CJ, Li Y, Duren WL, Erdos MR, Stringham HM, Chines PS, Jackson AU, Prokurnina-Olsson L, Ding CJ, Swift AJ, Narisu N, Hu T, Pruim R, Xiao R, Li XY, Conneely KN, Riebow NL, Sprau AG, Tong M, White PP, Hetrick KN, Barnhart MW, Bark CW, Goldstein JL, Watkins L, Xiang F, Saramies J, Buchanan TA, Watanabe RM, Valle TT, Kinnunen L, Abecasis GR, Pugh EW, Doheny KF, Bergman RN, Tuomilehto J, Collins FS, Boehnke M 2007 A genome-wide association study of type 2 diabetes in Finns detects multiple susceptibility variants. *Science* 316:1341–1345
- Sladek R, Rocheleau G, Rung J, Dina C, Shen L, Serre D, Boutin P, Vincent D, Belisle A, Hadjadj S, Balkau B, Heude B, Charpentier G, Hudson TJ, Montpetit A, Pshezhetsky AV, Prentki M, Posner BI, Balding DJ, Meyre D, Polychronakos C, Froguel P 2007 A genome-wide association study identifies novel risk loci for type 2 diabetes. *Nature* 445:881–885
- Zeggini E, Weedon MN, Lindgren CM, Frayling TM, Elliott KS, Lango H, Timpson NJ, Perry JR, Rayner NW, Freathy RM, Barrett JC, Shields B, Morris AP, Ellard S, Groves CJ, Harries LW, Marchini JL, Owen KR, Knight B, Cardon LR, Walker M, Hitman GA, Morris AD, Doney AS, Burton PR, Clayton DG, Craddock N, Deloukas P, Duncanson A, Kwiatkowski DP, Ouwehand WH, Samani NJ, Todd JA, Donnelly P, Davison D, Easton D, Evans D, Leung HT, Spencer CC, Tobin MD, Attwood AP, Boorman JP, Cant B, Everson U, Hussey JM, Jolley JD, Knight AS, Koch K, Meech E, Nutland S, Prowse CV, Stevens HE, Taylor NC, Walters GR, Walker NM, Watkins NA, Winzer T, Jones RW, McArdle WL,

- Ring SM, Strachan DP, Pembrey M, Breen G, St Clair D, Caesar S, Gordon-Smith K, Jones L, Fraser C, Green EK, Grozeva D, Hamshere ML, Holmans PA, Jones IR, Kirov G, Moskvina V, Nikolov I, O'Donovan M C, Owen MJ, Collier DA, Elkin A, Farmer A, Williamson R, McGuffin P, Young AH, Ferrier IN, Ball SG, Balmforth AJ, Barrett JH, Bishop DT, Iles MM, Maqbool A, Yuldasheva N, Hall AS, Braund PS, Dixon RJ, Mangino M, Stevens S, Thompson JR, Bredin F, Tremelling M, Parkes M, Drummond H, Lees CW, Nimmo ER, Satsangi J, Fisher SA, Forbes A, Lewis CM, Onnie CM, Prescott NJ, Sanderson J, Mathew CG, Barbour J, Mohiuddin MK, Todhunter CE, Mansfield JC, Ahmad T, Cummings FR, Jewell DP, Webster J, Brown MJ, Lathrop GM, Connell J, Dominiczak A, Braga Marcano CA, Burke B, Dobson R, Gungadool J, Lee KL, Munroe PB, Newhouse SJ, Onipinla A, Wallace C, Xue M, Caulfield M, Farrall M, Barton A, Bruce IN, Donovan H, Eyre S, Gilbert PD, Hider SL, Hinks AM, John SL, Potter C, Silman AJ, Symmons DP, Thomson W, Worthington J, Dunger DB, Widmer B, Newport M, Sirugo G, Lyons E, Vannberg F, Hill AV, Bradbury LA, Farrar C, Poynton JJ, Wordsworth P, Brown MA, Franklyn JA, Heward JM, Simmonds MJ, Gough SC, Seal S, Stratton MR, Rahman N, Ban M, Goris A, Sawcer SJ, Compston A, Conway D, Jallow M, Rockett KA, Bumpstead SJ, Chaney A, Downes K, Ghorri MJ, Gwilliam R, Hunt SE, Inouye M, Keniry A, King E, McGinnis R, Potter S, Ravindrarajah R, Whittaker P, Widdon C, Withers D, Cardin NJ, Ferreira T, Pereira-Gale J, Hallgrimsdottir IB, Howie BN, Su Z, Teo YY, Vukcevic D, Bentley D, Compston A, Ouwehand NJ, Samani MR, Isaacs JD, Morgan AW, Wilson GD, Arden-Jones A, Berg J, Brady A, Bradshaw N, Brewer C, Brice G, Bullman B, Campbell J, Castle B, Cetnarskyj R, Chapman C, Chu C, Coates N, Cole T, Davidson R, Donaldson A, Dorkins H, Douglas F, Eccles D, Eeles R, Elmslie F, Evans DG, Goff S, Goodman S, Goudie D, Gray J, Greenhalgh L, Gregory H, Hodgson SV, Homfray T, Houlston RS, Izatt L, Jackson L, Jeffers L, Johnson-Rofeffy V, Kavalier F, Kirk C, Laloo F, Langman C, Locke I, Longmuir M, Mackay J, Magee A, Mansour S, Miedzybrodzka Z, Miller J, Morrison P, Murday V, Paterson J, Pichert G, Porteous M, Rahman N, Rogers M, Rowe S, Shanley S, Sagar A, Scott G, Side L, Snadden L, Steel M, Thomas M, Thomas S, McCarthy MI, Hattersley AT 2007 Replication of genome-wide association signals in UK samples reveals risk loci for type 2 diabetes. *Science* 316:1336–1341
18. Klöppel G, Löhr M, Habich K, Oberholzer M, Heitz PU 1985 Islet pathology and the pathogenesis of type 1 and type 2 diabetes mellitus revisited. *Surv Synth Pathol Res* 4:110–125
  19. Clark A, Wells CA, Buley ID, Cruickshank JK, Vanhegan RI, Matthews DR, Cooper GJ, Holman RR, Turner RC 1988 Islet amyloid, increased A-cells, reduced B-cells and exocrine fibrosis: quantitative changes in the pancreas in type 2 diabetes. *Diabetes Res* 9:151–159
  20. Sakuraba H, Mizukami H, Yagihashi N, Wada R, Hanyu C, Yagihashi S 2002 Reduced  $\beta$ -cell mass and expression of oxidative stress-related DNA damage in the islet of Japanese type II diabetic patients. *Diabetologia* 45:85–96
  21. Butler AE, Janson J, Bonner-Weir S, Ritzel R, Rizza RA, Butler PC 2003  $\beta$ -Cell deficit and increased  $\beta$ -cell apoptosis in humans with type 2 diabetes. *Diabetes* 52:102–110
  22. Yoon KH, Ko SH, Cho JH, Lee JM, Ahn YB, Song KH, Yoo SJ, Kang MI, Cha BY, Lee KW, Son HY, Kang SK, Kim HS, Lee IK, Bonner-Weir S 2003 Selective  $\beta$ -cell loss and  $\alpha$ -cell expansion in patients with type 2 diabetes mellitus in Korea. *J Clin Endocrinol Metab* 88:2300–2308
  23. Poitout V, Robertson RP 2002 Minireview: secondary  $\beta$ -cell failure in type 2 diabetes—a convergence of glucotoxicity and lipotoxicity. *Endocrinology* 143:339–342
  24. Prentki M, Nolan CJ 2006 Islet  $\beta$ -cell failure in type 2 diabetes. *J Clin Invest* 116:1802–1812
  25. Cnop M, Welsh N, Jonas JC, Jörns A, Lenzen S, Eizirik DL 2005 Mechanisms of pancreatic  $\beta$ -cell death in type 1 and type 2 diabetes: many differences, few similarities. *Diabetes* 54(Suppl 2):S97–S107
  26. Maedler K, Sergeev P, Ris F, Oberholzer J, Joller-Jemelka HJ, Spinas GA, Kaiser N, Halban PA, Donath MY 2002 Glucose-induced  $\beta$ -cell production of IL-1 $\beta$  contributes to glucotoxicity in human pancreatic islets. *J Clin Invest* 110:851–860
  27. Welsh N, Cnop M, Kharroubi I, Bugliani M, Lupi R, Marchetti P, Eizirik DL 2005 Is there a role for locally produced interleukin-1 in the deleterious effects of high glucose or the type 2 diabetes milieu to human pancreatic islets? *Diabetes* 54:3238–3244
  28. Jörns A, Rath KJ, Bock O, Lenzen S 2006  $\beta$ -Cell death in hyperglycaemic *Psammomys obesus* is not cytokine-mediated. *Diabetologia* 49:2704–2712
  29. Berridge MJ 2002 The endoplasmic reticulum: a multifunctional signaling organelle. *Cell Calcium* 32:235–249
  30. Adesnik M, Lande M, Martin T, Sabatini DD 1976 Retention of mRNA on the endoplasmic reticulum membranes after in vivo disassembly of polysomes by an inhibitor of initiation. *J Cell Biol* 71:307–313
  31. Pilon M, Romisch K, Quach D, Schekman R 1998 Sec61p serves multiple roles in secretory precursor binding and translocation into the endoplasmic reticulum membrane. *Mol Biol Cell* 9:3455–3473
  32. Kornfeld R, Kornfeld S 1985 Assembly of asparagine-linked oligosaccharides. *Annu Rev Biochem* 54:631–664
  33. Gething MJ, Sambrook J 1992 Protein folding in the cell. *Nature* 355:33–45
  34. Bulleid NJ, Freedman RB 1988 Defective co-translational formation of disulphide bonds in protein disulphide-isomerase-deficient microsomes. *Nature* 335:649–651
  35. Cabibbo A, Pagani M, Fabbri M, Rocchi M, Farmery MR, Bulleid NJ, Sitia R 2000 ERO1-L, a human protein that favors disulfide bond formation in the endoplasmic reticulum. *J Biol Chem* 275:4827–4833
  36. Pagani M, Fabbri M, Benedetti C, Fassio A, Pilati S, Bulleid NJ, Cabibbo A, Sitia R 2000 Endoplasmic reticulum oxidoreductin 1- $\beta$  (ERO1-L $\beta$ ), a human gene induced in the course of the unfolded protein response. *J Biol Chem* 275:23685–23692
  37. van Anken E, Braakman I 2005 Versatility of the endoplasmic reticulum protein folding factory. *Crit Rev Biochem Mol Biol* 40:191–228
  38. Meunier L, Usherwood YK, Chung KT, Hendershot LM 2002 A subset of chaperones and folding enzymes form multiprotein complexes in endoplasmic reticulum to bind nascent proteins. *Mol Biol Cell* 13:4456–4469
  39. Ellgaard L, Helenius A 2003 Quality control in the endoplasmic reticulum. *Nat Rev Mol Cell Biol* 4:181–191
  40. Schroder M, Kaufman RJ 2005 The mammalian unfolded protein response. *Annu Rev Biochem* 74:739–789
  41. Brodsky JL 2007 The protective and destructive roles played by molecular chaperones during ERAD (endoplasmic-reticulum-associated degradation). *Biochem J* 404:353–363
  42. Patil C, Walter P 2001 Intracellular signaling from the endoplasmic reticulum to the nucleus: the unfolded protein response in yeast and mammals. *Curr Opin Cell Biol* 13:349–355
  43. Marciniak SJ, Ron D 2006 Endoplasmic reticulum stress signaling in disease. *Physiol Rev* 86:1133–1149
  44. Zhang K, Kaufman RJ 2006 Protein folding in the endoplasmic reticulum and the unfolded protein response. *Handb Exp Pharmacol* 172:69–91
  45. Ron D, Walter P 2007 Signal integration in the endoplasmic reticulum unfolded protein response. *Nat Rev Mol Cell Biol* 8:519–529
  46. Kozutsumi Y, Segal M, Normington K, Gething MJ, Sambrook J 1988 The presence of malformed proteins in the endoplasmic reticulum signals the induction of glucose-regulated proteins. *Nature* 332:462–464
  47. Mori K, Sant A, Kohno K, Normington K, Gething MJ, Sambrook JF 1992 A 22 bp cis-acting element is necessary and sufficient for the induction of the yeast KAR2 (BiP) gene by unfolded proteins. *EMBO J* 11:2583–2593
  48. Mori K, Ogawa N, Kawahara T, Yanagi H, Yura T 1998 Palindrome with spacer of one nucleotide is characteristic of the cis-acting unfolded protein response element in *Saccharomyces cerevisiae*. *J Biol Chem* 273:9912–9920
  49. Cox JS, Shamu CE, Walter P 1993 Transcriptional induction of genes encoding endoplasmic reticulum resident proteins requires a transmembrane protein kinase. *Cell* 73:1197–1206
  50. Mori K, Ma W, Gething MJ, Sambrook J 1993 A transmembrane

- protein with a *cdc2+*/CDC28-related kinase activity is required for signaling from the ER to the nucleus. *Cell* 74:743–756
51. **Shamu CE, Walter P** 1996 Oligomerization and phosphorylation of the Ire1p kinase during intracellular signaling from the endoplasmic reticulum to the nucleus. *EMBO J* 15:3028–3039
  52. **Welihinda AA, Kaufman RJ** 1996 The unfolded protein response pathway in *Saccharomyces cerevisiae*. Oligomerization and transphosphorylation of Ire1p (Ern1p) are required for kinase activation. *J Biol Chem* 271:18181–18187
  53. **Cox JS, Walter P** 1996 A novel mechanism for regulating activity of a transcription factor that controls the unfolded protein response. *Cell* 87:391–404
  54. **Kawahara T, Yanagi H, Yura T, Mori K** 1998 Unconventional splicing of HAC1/ERN4 mRNA required for the unfolded protein response. Sequence-specific and non-sequential cleavage of the splice sites. *J Biol Chem* 273:1802–1807
  55. **Niwa M, Patil CK, DeRisi J, Walter P** 2005 Genome-scale approaches for discovering novel nonconventional splicing substrates of the Ire1 nuclease. *Genome Biol* 6:R3
  56. **Welihinda AA, Tirasophon W, Kaufman RJ** 2000 The transcriptional co-activator ADA5 is required for HAC1 mRNA processing in vivo. *J Biol Chem* 275:3377–3381
  57. **Tirasophon W, Welihinda AA, Kaufman RJ** 1998 A stress response pathway from the endoplasmic reticulum to the nucleus requires a novel bifunctional protein kinase/endoribonuclease (Ire1p) in mammalian cells. *Genes Dev* 12:1812–1824
  58. **Wang XZ, Harding HP, Zhang Y, Jolicoeur EM, Kuroda M, Ron D** 1998 Cloning of mammalian Ire1 reveals diversity in the ER stress responses. *EMBO J* 17:5708–5717
  59. **Yoshida H, Matsui T, Yamamoto A, Okada T, Mori K** 2001 XBP1 mRNA is induced by ATF6 and spliced by IRE1 in response to ER stress to produce a highly active transcription factor. *Cell* 107:881–891
  60. **Calton M, Zeng H, Urano F, Till JH, Hubbard SR, Harding HP, Clark SG, Ron D** 2002 IRE1 couples endoplasmic reticulum load to secretory capacity by processing the XBP-1 mRNA. *Nature* 415:92–96
  61. **Lee K, Tirasophon W, Shen X, Michalak M, Prywes R, Okada T, Yoshida H, Mori K, Kaufman RJ** 2002 IRE1-mediated unconventional mRNA splicing and S2P-mediated ATF6 cleavage merge to regulate XBP1 in signaling the unfolded protein response. *Genes Dev* 16:452–466
  62. **Lee AH, Iwakoshi NN, Glimcher LH** 2003 XBP-1 regulates a subset of endoplasmic reticulum resident chaperone genes in the unfolded protein response. *Mol Cell Biol* 23:7448–7459
  63. **Yoshida H, Matsui T, Hosokawa N, Kaufman RJ, Nagata K, Mori K** 2003 A time-dependent phase shift in the mammalian unfolded protein response. *Dev Cell* 4:265–271
  64. **Lee AH, Chu GC, Iwakoshi NN, Glimcher LH** 2005 XBP-1 is required for biogenesis of cellular secretory machinery of exocrine glands. *EMBO J* 24:4368–4380
  65. **Hollien J, Weissman JS** 2006 Decay of endoplasmic reticulum-localized mRNAs during the unfolded protein response. *Science* 313:104–107
  66. **Pirot P, Naamane N, Libert F, Magnusson NE, Orntoft TF, Cardozo AK, Eizirik DL** 2007 Global profiling of genes modified by endoplasmic reticulum stress in pancreatic  $\beta$  cells reveals the early degradation of insulin mRNAs. *Diabetologia* 50:1006–1014
  67. **Dorner AJ, Wasley LC, Kaufman RJ** 1992 Overexpression of GRP78 mitigates stress induction of glucose regulated proteins and blocks segregation of selective proteins in Chinese hamster ovary cells. *EMBO J* 11:1563–1571
  68. **Bertolotti A, Zhang Y, Hendershot LM, Harding HP, Ron D** 2000 Dynamic interaction of BiP and ER stress transducers in the unfolded-protein response. *Nat Cell Biol* 2:326–332
  69. **Liu CY, Schroder M, Kaufman RJ** 2000 Ligand-independent dimerization activates the stress response kinases IRE1 and PERK in the lumen of the endoplasmic reticulum. *J Biol Chem* 275:24881–24885
  70. **Shen J, Chen X, Hendershot L, Prywes R** 2002 ER stress regulation of ATF6 localization by dissociation of BiP/GRP78 binding and unmasking of Golgi localization signals. *Dev Cell* 3:99–111
  71. **Credle JJ, Finer-Moore JS, Papa FR, Stroud RM, Walter P** 2005 On the mechanism of sensing unfolded protein in the endoplasmic reticulum. *Proc Natl Acad Sci USA* 102:18773–18784
  72. **Zhou J, Liu CY, Back SH, Clark RL, Peisach D, Xu Z, Kaufman RJ** 2006 The crystal structure of human IRE1 luminal domain reveals a conserved dimerization interface required for activation of the unfolded protein response. *Proc Natl Acad Sci USA* 103:14343–14348
  73. **Oikawa D, Kimata Y, Kohno K** 2007 Self-association and BiP dissociation are not sufficient for activation of the ER stress sensor Ire1. *J Cell Sci* 120:1681–1688
  74. **Hong M, Luo S, Baumeister P, Huang JM, Gogia RK, Li M, Lee AS** 2004 Underglycosylation of ATF6 as a novel sensing mechanism for activation of the unfolded protein response. *J Biol Chem* 279:11354–11363
  75. **Nadanaka S, Okada T, Yoshida H, Mori K** 2007 Role of disulfide bridges formed in the luminal domain of ATF6 in sensing endoplasmic reticulum stress. *Mol Cell Biol* 27:1027–1043
  76. **Yoshida H, Haze K, Yanagi H, Yura T, Mori K** 1998 Identification of the cis-acting endoplasmic reticulum stress response element responsible for transcriptional induction of mammalian glucose-regulated proteins. Involvement of basic leucine zipper transcription factors. *J Biol Chem* 273:33741–33749
  77. **Okada T, Yoshida H, Akazawa R, Negishi M, Mori K** 2002 Distinct roles of activating transcription factor 6 (ATF6) and double-stranded RNA-activated protein kinase-like endoplasmic reticulum kinase (PERK) in transcription during the mammalian unfolded protein response. *Biochem J* 366:585–594
  78. **Ni M, Lee AS** 2007 ER chaperones in mammalian development and human diseases. *FEBS Lett* 581:3641–3651
  79. **Rutkowski DT, Kang SW, Goodman AG, Garrison JL, Taunton J, Katze MG, Kaufman RJ, Hegde RS** 2007 The role of p58<sup>IPK</sup> in protecting the stressed endoplasmic reticulum. *Mol Biol Cell* 18:3681–3691
  80. **Haze K, Okada T, Yoshida H, Yanagi H, Yura T, Negishi M, Mori K** 2001 Identification of the G13 (cAMP-response-element-binding protein-related protein) gene product related to activating transcription factor 6 as a transcriptional activator of the mammalian unfolded protein response. *Biochem J* 355:19–28
  81. **Raggio C, Rapin N, Stirling J, Gobeil P, Smith-Windsor E, O'Hare P, Misra V** 2002 Luman, the cellular counterpart of herpes simplex virus VP16, is processed by regulated intramembrane proteolysis. *Mol Cell Biol* 22:5639–5649
  82. **Kondo S, Murakami T, Tatsumi K, Ogata M, Kanemoto S, Otori K, Iseki K, Wanaka A, Imaizumi K** 2005 OASIS, a CREB/ATF-family member, modulates UPR signalling in astrocytes. *Nat Cell Biol* 7:186–194
  83. **Nagamori I, Yabuta N, Fujii T, Tanaka H, Yomogida K, Nishimune Y, Nojima H** 2005 Tisp40, a spermatid specific bZip transcription factor, functions by binding to the unfolded protein response element via the Rip pathway. *Genes Cells* 10:575–594
  84. **Zhang K, Shen X, Wu J, Sakaki K, Saunders T, Rutkowski DT, Back SH, Kaufman RJ** 2006 Endoplasmic reticulum stress activates cleavage of CREBH to induce a systemic inflammatory response. *Cell* 124:587–599
  85. **Harding HP, Zhang Y, Ron D** 1999 Protein translation and folding are coupled by an endoplasmic-reticulum-resident kinase. *Nature* 397:271–274
  86. **Hinnebusch AG** 1993 Gene-specific translational control of the yeast GCN4 gene by phosphorylation of eukaryotic initiation factor 2. *Mol Microbiol* 10:215–223
  87. **Harding HP, Novoa I, Zhang Y, Zeng H, Wek R, Schapira M, Ron D** 2000 Regulated translation initiation controls stress-induced gene expression in mammalian cells. *Mol Cell* 6:1099–1108
  88. **Lu PD, Harding HP, Ron D** 2004 Translation reinitiation at alternative open reading frames regulates gene expression in an integrated stress response. *J Cell Biol* 167:27–33
  89. **Vattem KM, Wek RC** 2004 Reinitiation involving upstream ORFs regulates ATF4 mRNA translation in mammalian cells. *Proc Natl Acad Sci USA* 101:11269–11274
  90. **Harding HP, Zhang Y, Zeng H, Novoa I, Lu PD, Calton M, Sadri N, Yun C, Popko B, Paules R, Stojdl DF, Bell JC, Hettmann T, Leiden JM, Ron D** 2003 An integrated stress response regulates

- amino acid metabolism and resistance to oxidative stress. *Mol Cell* 11:619–633
91. **Ma Y, Brewer JW, Diehl JA, Hendershot LM** 2002 Two distinct stress signaling pathways converge upon the CHOP promoter during the mammalian unfolded protein response. *J Mol Biol* 318:1351–1365
  92. **Jiang HY, Wek SA, McGrath BC, Lu D, Hai T, Harding HP, Wang X, Ron D, Cavener DR, Wek RC** 2004 Activating transcription factor 3 is integral to the eukaryotic initiation factor 2 kinase stress response. *Mol Cell Biol* 24:1365–1377
  93. **Pirot P, Ortis F, Cnop M, Ma Y, Hendershot LM, Eizirik DL, Cardozo AK** 2007 Transcriptional regulation of the endoplasmic reticulum stress gene chop in pancreatic insulin-producing cells. *Diabetes* 56:1069–1077
  94. **Connor JH, Weiser DC, Li S, Hallenbeck JM, Shenolikar S** 2001 Growth arrest and DNA damage-inducible protein GADD34 assembles a novel signaling complex containing protein phosphatase 1 and inhibitor 1. *Mol Cell Biol* 21:6841–6850
  95. **Novoa I, Zeng H, Harding HP, Ron D** 2001 Feedback inhibition of the unfolded protein response by GADD34-mediated dephosphorylation of eIF2 $\alpha$ . *J Cell Biol* 153:1011–1022
  96. **Brush MH, Weiser DC, Shenolikar S** 2003 Growth arrest and DNA damage-inducible protein GADD34 targets protein phosphatase 1a to the endoplasmic reticulum and promotes dephosphorylation of the  $\alpha$  subunit of eukaryotic translation initiation factor 2. *Mol Cell Biol* 23:1292–1303
  97. **Kojima E, Takeuchi A, Haneda M, Yagi A, Hasegawa T, Yamaki K, Takeda K, Akira S, Shimokata K, Isobe K** 2003 The function of GADD34 is a recovery from a shutoff of protein synthesis induced by ER stress: elucidation by GADD34-deficient mice. *FASEB J* 17:1573–1575
  98. **Ma Y, Hendershot LM** 2003 Delineation of a negative feedback regulatory loop that controls protein translation during endoplasmic reticulum stress. *J Biol Chem* 278:34864–34873
  99. **Novoa I, Zhang Y, Zeng H, Jungreis R, Harding HP, Ron D** 2003 Stress-induced gene expression requires programmed recovery from translational repression. *EMBO J* 22:1180–1187
  100. **Yan W, Frank CL, Korth MJ, Sopher BL, Novoa I, Ron D, Katze MG** 2002 Control of PERK eIF2 $\alpha$  kinase activity by the endoplasmic reticulum stress-induced molecular chaperone P58<sup>IPK</sup>. *Proc Natl Acad Sci USA* 99:15920–15925
  101. **van Huizen R, Martindale JL, Gorospe M, Holbrook NJ** 2003 P58<sup>IPK</sup>, a novel endoplasmic reticulum stress-inducible protein and potential negative regulator of eIF2 $\alpha$  signaling. *J Biol Chem* 278:15558–15564
  102. **Kang SW, Rane NS, Kim SJ, Garrison JL, Taunton J, Hegde RS** 2006 Substrate-specific translational attenuation during ER stress defines a pre-emptive quality control pathway. *Cell* 127:999–1013
  103. **Schroder M, Kaufman RJ** 2006 Divergent roles of IRE1 $\alpha$  and PERK in the unfolded protein response. *Curr Mol Med* 6:5–36
  104. **Zhang K, Wong HN, Song B, Miller CN, Scheuner D, Kaufman RJ** 2005 The unfolded protein response sensor IRE1 $\alpha$  is required at 2 distinct steps in B cell lymphopoiesis. *J Clin Invest* 115:268–281
  105. **Harding HP, Zeng H, Zhang Y, Jungreis R, Chung P, Plesken H, Sabatini DD, Ron D** 2001 Diabetes mellitus and exocrine pancreatic dysfunction in PERK<sup>-/-</sup> mice reveals a role for translational control in secretory cell survival. *Mol Cell* 7:1153–1163
  106. **Zhang P, McGrath B, Li S, Frank A, Zambito F, Reinert J, Gannon M, Ma K, McNaughton K, Cavener DR** 2002 The PERK eukaryotic initiation factor 2 $\alpha$  kinase is required for the development of the skeletal system, postnatal growth, and the function and viability of the pancreas. *Mol Cell Biol* 22:3864–3874
  107. **Meusser B, Hirsch C, Jarosch E, Sommer T** 2005 ERAD: the long road to destruction. *Nat Cell Biol* 7:766–772
  108. **Nagasawa K, Higashi T, Hosokawa N, Kaufman RJ, Nagata K** 2007 Simultaneous induction of the four subunits of the TRAP complex by ER stress accelerates ER degradation. *EMBO Rep* 8:483–489
  109. **Lilley BN, Ploegh HL** 2004 A membrane protein required for dislocation of misfolded proteins from the ER. *Nature* 429:834–840
  110. **Ye Y, Shibata Y, Yun C, Ron D, Rapoport TA** 2004 A membrane protein complex mediates retro-translocation from the ER lumen into the cytosol. *Nature* 429:841–847
  111. **Lilley BN, Ploegh HL** 2005 Multiprotein complexes that link dislocation, ubiquitination, and extraction of misfolded proteins from the endoplasmic reticulum membrane. *Proc Natl Acad Sci USA* 102:14296–14301
  112. **Wahlman J, DeMartino GN, Skach WR, Bulleid NJ, Brodsky JL, Johnson AE** 2007 Real-time fluorescence detection of ERAD substrate retrotranslocation in a mammalian in vitro system. *Cell* 129:943–955
  113. **Ploegh HL** 2007 A lipid-based model for the creation of an escape hatch from the endoplasmic reticulum. *Nature* 448:435–438
  114. **Bernales S, McDonald KL, Walter P** 2006 Autophagy counterbalances endoplasmic reticulum expansion during the unfolded protein response. *PLoS Biol* 4:e223
  115. **Ogata M, Hino S, Saito A, Morikawa K, Kondo S, Kanemoto S, Murakami T, Taniguchi M, Tani I, Yoshinaga K, Shiosaka S, Hammarback JA, Urano F, Imaizumi K** 2006 Autophagy is activated for cell survival after endoplasmic reticulum stress. *Mol Cell Biol* 26:9220–9231
  116. **Yorimitsu T, Nair U, Yang Z, Klionsky DJ** 2006 Endoplasmic reticulum stress triggers autophagy. *J Biol Chem* 281:30299–30304
  117. **Hoyer-Hansen M, Jaattela M** 2007 Connecting endoplasmic reticulum stress to autophagy by unfolded protein response and calcium. *Cell Death Differ* 14:1576–1582
  118. **Yorimitsu T, Klionsky DJ** 2005 Autophagy: molecular machinery for self-eating. *Cell Death Differ* 12(Suppl 2):1542–1552
  119. **Kouyrouk Y, Fujita E, Tanida I, Ueno T, Isoai A, Kumagai H, Ogawa S, Kaufman RJ, Kominami E, Momoi T** 2007 ER stress (PERK/eIF2 $\alpha$  phosphorylation) mediates the polyglutamine-induced LC3 conversion, an essential step for autophagy formation. *Cell Death Differ* 14:230–239
  120. **Urano F, Wang X, Bertolotti A, Zhang Y, Chung P, Harding HP, Ron D** 2000 Coupling of stress in the ER to activation of JNK protein kinases by transmembrane protein kinase IRE1. *Science* 287:664–666
  121. **Nishitoh H, Matsuzawa A, Tobiume K, Saegusa K, Takeda K, Inoue K, Hori S, Kakizuka A, Ichijo H** 2002 ASK1 is essential for endoplasmic reticulum stress-induced neuronal cell death triggered by expanded polyglutamine repeats. *Genes Dev* 16:1345–1355
  122. **Kaneko M, Niinuma Y, Nomura Y** 2003 Activation signal of nuclear factor- $\kappa$ B in response to endoplasmic reticulum stress is transduced via IRE1 and tumor necrosis factor receptor-associated factor 2. *Biol Pharm Bull* 26:931–935
  123. **Hu P, Han Z, Couvillon AD, Kaufman RJ, Exton JH** 2006 Autocrine tumor necrosis factor  $\alpha$  links endoplasmic reticulum stress to the membrane death receptor pathway through IRE1 $\alpha$ -mediated NF- $\kappa$ B activation and down-regulation of TRAF2 expression. *Mol Cell Biol* 26:3071–3084
  124. **Ortis F, Cardozo AK, Crispim D, Storling J, Mandrup-Poulsen T, Eizirik DL** 2006 Cytokine-induced proapoptotic gene expression in insulin-producing cells is related to rapid, sustained, and nonoscillatory nuclear factor- $\kappa$ B activation. *Mol Endocrinol* 20:1867–1879
  125. **Yoneda T, Imaizumi K, Oono K, Yui D, Gomi F, Katayama T, Tohyama M** 2001 Activation of caspase-12, an endoplasmic reticulum (ER) resident caspase, through tumor necrosis factor receptor-associated factor 2-dependent mechanism in response to the ER stress. *J Biol Chem* 276:13935–13940
  126. **Boyce M, Bryant KF, Jousse C, Long K, Harding HP, Scheuner D, Kaufman RJ, Ma D, Coen DM, Ron D, Yuan J** 2005 A selective inhibitor of eIF2 $\alpha$  dephosphorylation protects cells from ER stress. *Science* 307:935–939
  127. **Cullinan SB, Diehl JA** 2006 Coordination of ER and oxidative stress signaling: the PERK/Nrf2 signaling pathway. *Int J Biochem Cell Biol* 38:317–332
  128. **Cnop M, Ladrerie L, Hekerman P, Ortis F, Cardozo AK, Dogusan Z, Flamez D, Boyce M, Yuan J, Eizirik DL** 2007 Selective inhibition of eukaryotic translation initiation factor 2 $\alpha$  dephosphorylation potentiates fatty acid-induced endoplasmic reticulum stress and causes pancreatic  $\beta$ -cell dysfunction and apoptosis. *J Biol Chem* 282:3989–3997
  129. **Gil J, Esteban M** 2000 Induction of apoptosis by the dsRNA-dependent protein kinase (PKR): mechanism of action. *Apoptosis* 5:107–114



130. Nakanishi K, Sudo T, Morishima N 2005 Endoplasmic reticulum stress signaling transmitted by ATF6 mediates apoptosis during muscle development. *J Cell Biol* 169:555–560
131. Oyadomari S, Mori M 2004 Roles of CHOP/GADD153 in endoplasmic reticulum stress. *Cell Death Differ* 11:381–389
132. Cao Z, Umek RM, McKnight SL 1991 Regulated expression of three C/EBP isoforms during adipose conversion of 3T3-L1 cells. *Genes Dev* 5:1538–1552
133. Eizirik DL, Bjorklund A, Cagliero E 1993 Genotoxic agents increase expression of growth arrest and DNA damage-inducible genes GADD 153 and gadd 45 in rat pancreatic islets. *Diabetes* 42:738–745
134. Benavides A, Pastor D, Santos P, Tranque P, Calvo S 2005 CHOP plays a pivotal role in the astrocyte death induced by oxygen and glucose deprivation. *Glia* 52:261–275
135. Tajiri S, Yano S, Morioka M, Kuratsu J, Mori M, Gotoh T 2006 CHOP is involved in neuronal apoptosis induced by neurotrophic factor deprivation. *FEBS Lett* 580:3462–3468
136. Williams BL, Lipkin WI 2006 Endoplasmic reticulum stress and neurodegeneration in rats neonatally infected with borna disease virus. *J Virol* 80:8613–8626
137. Gotoh T, Terada K, Oyadomari S, Mori M 2004 hsp70-DnaJ chaperone pair prevents nitric oxide- and CHOP-induced apoptosis by inhibiting translocation of Bax to mitochondria. *Cell Death Differ* 11:390–402
138. McCullough KD, Martindale JL, Klotz LO, Aw TY, Holbrook NJ 2001 Gadd153 sensitizes cells to endoplasmic reticulum stress by down-regulating Bcl2 and perturbing the cellular redox state. *Mol Cell Biol* 21:1249–1259
139. Ciccaglione AR, Marcantonio C, Tritarelli E, Equestre M, Vendittelli F, Costantino A, Geraci A, Rapicetta M 2007 Activation of the ER stress gene gadd153 by hepatitis C virus sensitizes cells to oxidant injury. *Virus Res* 126:128–138
140. Yamaguchi H, Wang HG 2004 CHOP is involved in endoplasmic reticulum stress-induced apoptosis by enhancing DR5 expression in human carcinoma cells. *J Biol Chem* 279:45495–45502
141. Puthalakath H, O'Reilly LA, Gunn P, Lee L, Kelly PN, Huntington ND, Hughes PD, Michalak EM, McKimm-Breschkin J, Motoyama N, Gotoh T, Akira S, Bouillet P, Strasser A 2007 ER stress triggers apoptosis by activating BH3-only protein Bim. *Cell* 129:1337–1349
142. Ohoka N, Yoshii S, Hattori T, Onozaki K, Hayashi H 2005 TRB3, a novel ER stress-inducible gene, is induced via ATF4-CHOP pathway and is involved in cell death. *EMBO J* 24:1243–1255
143. Newmeyer DD, Ferguson-Miller S 2003 Mitochondria: releasing power for life and unleashing the machineries of death. *Cell* 112:481–490
144. Oakes SA, Lin SS, Bassik MC 2006 The control of endoplasmic reticulum-initiated apoptosis by the BCL-2 family of proteins. *Curr Mol Med* 6:99–109
145. Lam M, Dubyak G, Chen L, Nunez G, Miesfeld RL, Distelhorst CW 1994 Evidence that BCL-2 represses apoptosis by regulating endoplasmic reticulum-associated Ca<sup>2+</sup> fluxes. *Proc Natl Acad Sci USA* 91:6569–6573
146. Zhang QH, Sheng HP, Loh TT 2001 Bcl-2 protects HL-60 cells from apoptosis by stabilizing their intracellular calcium pools. *Life Sci* 68:2873–2883
147. Distelhorst CW, McCormick TS 1996 Bcl-2 acts subsequent to and independent of Ca<sup>2+</sup> fluxes to inhibit apoptosis in thapsigargin- and glucocorticoid-treated mouse lymphoma cells. *Cell Calcium* 19:473–483
148. Wei MC, Zong WX, Cheng EH, Lindsten T, Panoutsakopoulou V, Ross AJ, Roth KA, MacGregor GR, Thompson CB, Korsmeyer SJ 2001 Proapoptotic BAX and BAK: a requisite gateway to mitochondrial dysfunction and death. *Science* 292:727–730
149. Zhang D, Armstrong JS 2007 Bax and the mitochondrial permeability transition cooperate in the release of cytochrome c during endoplasmic reticulum-stress-induced apoptosis. *Cell Death Differ* 14:703–715
150. Scorrano L, Oakes SA, Opferman JT, Cheng EH, Sorcinelli MD, Pozzan T, Korsmeyer SJ 2003 BAX and BAK regulation of endoplasmic reticulum Ca<sup>2+</sup>: a control point for apoptosis. *Science* 300:135–139
151. Oakes SA, Scorrano L, Opferman JT, Bassik MC, Nishino M, Pozzan T, Korsmeyer SJ 2005 Proapoptotic BAX and BAK regulate the type 1 inositol trisphosphate receptor and calcium leak from the endoplasmic reticulum. *Proc Natl Acad Sci USA* 102:105–110
152. Reimertz C, Kogel D, Rami A, Chittenden T, Prehn JH 2003 Gene expression during ER stress-induced apoptosis in neurons: induction of the BH3-only protein Bbc3/PUMA and activation of the mitochondrial apoptosis pathway. *J Cell Biol* 162:587–597
153. Morishima N, Nakanishi K, Tsuchiya K, Shibata T, Seiwa E 2004 Translocation of Bim to the endoplasmic reticulum (ER) mediates ER stress signaling for activation of caspase-12 during ER stress-induced apoptosis. *J Biol Chem* 279:50375–50381
154. Mathai JP, Germain M, Shore GC 2005 BH3-only BIK regulates BAX, BAK-dependent release of Ca<sup>2+</sup> from endoplasmic reticulum stores and mitochondrial apoptosis during stress-induced cell death. *J Biol Chem* 280:23829–23836
155. Li J, Lee B, Lee AS 2006 Endoplasmic reticulum stress-induced apoptosis: multiple pathways and activation of p53-up-regulated modulator of apoptosis (PUMA) and NOXA by p53. *J Biol Chem* 281:7260–7270
156. Rao RV, Hermel E, Castro-Obregon S, del Rio G, Ellerby LM, Ellerby HM, Bredesen DE 2001 Coupling endoplasmic reticulum stress to the cell death program. Mechanism of caspase activation. *J Biol Chem* 276:33869–33874
157. Morishima N, Nakanishi K, Takenouchi H, Shibata T, Yasuhiko Y 2002 An endoplasmic reticulum stress-specific caspase cascade in apoptosis. Cytochrome c-independent activation of caspase-9 by caspase-12. *J Biol Chem* 277:34287–34294
158. Dahmer MK 2005 Caspases-2, -3, and -7 are involved in thapsigargin-induced apoptosis of SH-SY5Y neuroblastoma cells. *J Neurosci Res* 80:576–583
159. Cheung HH, Lynn Kelly N, Liston P, Korneluk RG 2006 Involvement of caspase-2 and caspase-9 in endoplasmic reticulum stress-induced apoptosis: a role for the IAPs. *Exp Cell Res* 312:2347–2357
160. Liu N, Scofield VL, Qiang W, Yan M, Kuang X, Wong PK 2006 Interaction between endoplasmic reticulum stress and caspase 8 activation in retrovirus MoMuLV-ts1-infected astrocytes. *Virology* 348:398–405
161. Masud A, Mohapatra A, Lakhani SA, Ferrandino A, Hakem R, Flavell RA 2007 Endoplasmic reticulum stress-induced death of mouse embryonic fibroblasts requires the intrinsic pathway of apoptosis. *J Biol Chem* 282:14132–14139
162. Nakagawa T, Zhu H, Morishima N, Li E, Xu J, Yankner BA, Yuan J 2000 Caspase-12 mediates endoplasmic-reticulum-specific apoptosis and cytotoxicity by amyloid- $\beta$ . *Nature* 403:98–103
163. Szegezdi E, Fitzgerald U, Samali A 2003 Caspase-12 and ER-stress-mediated apoptosis: the story so far. *Ann NY Acad Sci* 1010:186–194
164. Lamkanfi M, Festjens N, Declercq W, Vanden Berghe T, Vandennebeele P 2007 Caspases in cell survival, proliferation and differentiation. *Cell Death Differ* 14:44–55
165. Di Sano F, Ferraro E, Tufi R, Achsel T, Piacentini M, Cecconi F 2006 Endoplasmic reticulum stress induces apoptosis by an apoptosis-dependent but caspase 12-independent mechanism. *J Biol Chem* 281:2693–2700
166. Saleh M, Mathison JC, Wolinski MK, Bensinger SJ, Fitzgerald P, Droin N, Ulevitch RJ, Green DR, Nicholson DW 2006 Enhanced bacterial clearance and sepsis resistance in caspase-12-deficient mice. *Nature* 440:1064–1068
167. Oeppen J, Vaupel JW 2002 Demography. Broken limits to life expectancy. *Science* 296:1029–1031
168. Hill JO 2006 Understanding and addressing the epidemic of obesity: an energy balance perspective. *Endocr Rev* 27:750–761
169. Rhodes CJ, Shoelson SE, Halban PA 2005 Insulin biosynthesis, processing, and chemistry. In: Kahn CR, Weir GC, King GL, Jacobson AM, Moses AC, Smith RJ, eds. *Joslin's diabetes mellitus*. 14th ed. Philadelphia: Lippincott Williams, Wilkins; 45–62
170. Van Lommel L, Janssens K, Quintens R, Tsukamoto K, Vander Mierde D, Lemaire K, Denef C, Jonas JC, Martens G, Pipeleers D, Schuit FC 2006 Probe-independent and direct quantification of insulin mRNA and growth hormone mRNA in enriched cell preparations. *Diabetes* 55:3214–3220
171. Schuit FC, In't Veld PA, Pipeleers DG 1988 Glucose stimulates

- proinsulin biosynthesis by a dose-dependent recruitment of pancreatic  $\beta$  cells. *Proc Natl Acad Sci USA* 85:3865–3869
172. Lin BJ, Nagy BR, Haist RE 1972 Effect of various concentrations of glucose on insulin biosynthesis. *Endocrinology* 91:309–311
  173. Itoh N, Okamoto H 1980 Translational control of proinsulin synthesis by glucose. *Nature* 283:100–102
  174. Welsh M, Scherberg N, Gilmore R, Steiner DF 1986 Translational control of insulin biosynthesis. Evidence for regulation of elongation, initiation and signal-recognition-particle-mediated translational arrest by glucose. *Biochem J* 235:459–467
  175. Goodge KA, Hutton JC 2000 Translational regulation of proinsulin biosynthesis and proinsulin conversion in the pancreatic  $\beta$ -cell. *Semin Cell Dev Biol* 11:235–242
  176. Dodson G, Steiner D 1998 The role of assembly in insulin's biosynthesis. *Curr Opin Struct Biol* 8:189–194
  177. Wang J, Takeuchi T, Tanaka S, Kubo SK, Kayo T, Lu D, Takata K, Koizumi A, Izumi T 1999 A mutation in the insulin 2 gene induces diabetes with severe pancreatic  $\beta$ -cell dysfunction in the Mody mouse. *J Clin Invest* 103:27–37
  178. Herbach N, Rathkolb B, Kemter E, Pichl L, Klafien M, de Angelis MH, Halban PA, Wolf E, Aigner B, Wanke R 2007 Dominant-negative effects of a novel mutated *Ins2* allele causes early-onset diabetes and severe  $\beta$ -cell loss in Munich *Ins2*<sup>C95S</sup> mutant mice. *Diabetes* 56:1268–1276
  179. Kobayashi T, Ogawa S, Yura T, Yanagi H 2000 Abundant expression of 150-kDa oxygen-regulated protein in mouse pancreatic  $\beta$  cells is correlated with insulin secretion. *Biochem Biophys Res Commun* 267:831–837
  180. Oyadomari S, Takeda K, Takiguchi M, Gotoh T, Matsumoto M, Wada I, Akira S, Araki E, Mori M 2001 Nitric oxide-induced apoptosis in pancreatic  $\beta$  cells is mediated by the endoplasmic reticulum stress pathway. *Proc Natl Acad Sci USA* 98:10845–10850
  181. Elouil H, Bensellam M, Guiot Y, Vander Mierde D, Pascal SM, Schuit FC, Jonas JC 2007 Acute nutrient regulation of the unfolded protein response and integrated stress response in cultured rat pancreatic islets. *Diabetologia* 50:1442–1452
  182. Dowling P, O'Driscoll L, O'Sullivan F, Dowd A, Henry M, Jeppesen PB, Meleady P, Clynes M 2006 Proteomic screening of glucose-responsive and glucose non-responsive MIN-6  $\beta$  cells reveals differential expression of proteins involved in protein folding, secretion and oxidative stress. *Proteomics* 6:6578–6587
  183. Scheuner D, Mierde DV, Song B, Flamez D, Creemers JW, Tsukamoto K, Ribick M, Schuit FC, Kaufman RJ 2005 Control of mRNA translation preserves endoplasmic reticulum function in  $\beta$  cells and maintains glucose homeostasis. *Nat Med* 11:757–764
  184. Vander Mierde D, Scheuner D, Quintens R, Patel R, Song B, Tsukamoto K, Beullens M, Kaufman RJ, Bollen M, Schuit FC 2007 Glucose activates a protein phosphatase-1-mediated signaling pathway to enhance overall translation in pancreatic  $\beta$ -cells. *Endocrinology* 148:609–617
  185. Lipson KL, Fonseca SG, Ishigaki S, Nguyen LX, Foss E, Bortell R, Rossini AA, Urano F 2006 Regulation of insulin biosynthesis in pancreatic  $\beta$  cells by an endoplasmic reticulum-resident protein kinase IRE1. *Cell Metab* 4:245–254
  186. Delepine M, Nicolino M, Barrett T, Golamaully M, Lathrop GM, Julier C 2000 EIF2AK3, encoding translation initiation factor 2- $\alpha$  kinase 3, is mutated in patients with Wolcott-Rallison syndrome. *Nat Genet* 25:406–409
  187. Senee V, Vattem KM, Delepine M, Rainbow LA, Haton C, Lecoq A, Shaw NJ, Robert JJ, Rومان R, Diatloff-Zito C, Michaud JL, Bin-Abbas B, Taha D, Zabel B, Franceschini P, Topaloglu AK, Lathrop GM, Barrett TG, Nicolino M, Wek RC, Julier C 2004 Wolcott-Rallison syndrome: clinical, genetic, and functional study of EIF2AK3 mutations and suggestion of genetic heterogeneity. *Diabetes* 53:1876–1883
  188. Thornton CM, Carson DJ, Stewart FJ 1997 Autopsy findings in the Wolcott-Rallison syndrome. *Pediatr Pathol Lab Med* 17:487–496
  189. Zhang W, Feng D, Li Y, Iida K, McGrath B, Cavener DR 2006 PERK EIF2AK3 control of pancreatic  $\beta$  cell differentiation and proliferation is required for postnatal glucose homeostasis. *Cell Metab* 4:491–497
  190. Inoue H, Tanizawa Y, Wasson J, Behn P, Kalidas K, Bernal-Mizrachi E, Mueckler M, Marshall H, Donis-Keller H, Crock P, Rogers D, Mikuni M, Kumashiro H, Higashi K, Sobue G, Oka Y, Permutt MA 1998 A gene encoding a transmembrane protein is mutated in patients with diabetes mellitus and optic atrophy (Wolfram syndrome). *Nat Genet* 20:143–148
  191. Altshuler D, Hirschhorn JN, Klannemark M, Lindgren CM, Vohl MC, Nemesh J, Lane CR, Schaffner SF, Bolk S, Brewer C, Tuomi T, Gaudet D, Hudson TJ, Daly M, Groop L, Lander ES 2000 The common PPAR $\gamma$  Pro12Ala polymorphism is associated with decreased risk of type 2 diabetes. *Nat Genet* 26:76–80
  192. Gloyn AL, Weedon MN, Owen KR, Turner MJ, Knight BA, Hitman G, Walker M, Levy JC, Sampson M, Halford S, McCarthy MI, Hattersley AT, Frayling TM 2003 Large-scale association studies of variants in genes encoding the pancreatic  $\beta$ -cell  $K_{ATP}$  channel subunits Kir6.2 (KCNJ11) and SUR1 (ABCC8) confirm that the KCNJ11 E23K variant is associated with type 2 diabetes. *Diabetes* 52:568–572
  193. Weedon MN, Frayling TM, Shields B, Knight B, Turner T, Metcalf BS, Voss L, Wilkin TJ, McCarthy A, Ben-Shlomo Y, Davey Smith G, Ring S, Jones R, Golding J, Byberg L, Mann V, Axelsson T, Syvanen AC, Leon D, Hattersley AT 2005 Genetic regulation of birth weight and fasting glucose by a common polymorphism in the islet cell promoter of the glucokinase gene. *Diabetes* 54:576–581
  194. Holmkvist J, Cervin C, Lyssenko V, Winckler W, Anevski D, Cilio C, Almgren P, Berglund G, Nilsson P, Tuomi T, Lindgren CM, Altshuler D, Groop L 2006 Common variants in HNF-1 $\alpha$  and risk of type 2 diabetes. *Diabetologia* 49:2882–2891
  195. Minton JA, Hattersley AT, Owen K, McCarthy MI, Walker M, Latif F, Barrett T, Frayling TM 2002 Association studies of genetic variation in the WFS1 gene and type 2 diabetes in U.K. populations. *Diabetes* 51:1287–1290
  196. Sandhu MS, Weedon MN, Fawcett KA, Wasson J, Debenham SL, Daly A, Lango H, Frayling TM, Neumann RJ, Sherva R, Blech I, Pharoah PD, Palmer CN, Kimber C, Tavendale R, Morris AD, McCarthy MI, Walker M, Hitman G, Glaser B, Permutt MA, Hattersley AT, Wareham NJ, Barroso I 2007 Common variants in WFS1 confer risk of type 2 diabetes. *Nat Genet* 39:951–953
  197. Thameem F, Farook VS, Bogardus C, Prochazka M 2006 Association of amino acid variants in the activating transcription factor 6 gene (ATF6) on 1q21–q23 with type 2 diabetes in Pima Indians. *Diabetes* 55:839–842
  198. Das SK, Chu WS, Hale TC, Wang X, Craig RL, Wang H, Shuldiner AR, Froguel P, Deloukas P, McCarthy MI, Zeggini E, Hasstedt SJ, Elbein SC 2006 Polymorphisms in the glucokinase-associated, dual-specificity phosphatase 12 (DUSP12) gene under chromosome 1q21 linkage peak are associated with type 2 diabetes. *Diabetes* 55:2631–2639
  199. Laybutt DR, Preston AM, Akerfeldt MC, Kench JG, Busch AK, Biankin AV, Biden TJ 2007 Endoplasmic reticulum stress contributes to  $\beta$  cell apoptosis in type 2 diabetes. *Diabetologia* 50:752–763
  200. Marchetti P, Bugliani M, Lupi R, Marselli L, Masini M, Boggi U, Filippini F, Weir GC, Eizirik DL, Cnop M 2007 The endoplasmic reticulum in pancreatic  $\beta$ -cells of type 2 diabetes patients. *Diabetologia* 50:2486–2494
  201. Hartman MG, Lu D, Kim ML, Kociba GJ, Shukri T, Buteau J, Wang X, Frankel WL, Guttridge D, Prentki M, Grey ST, Ron D, Hai T 2004 Role for activating transcription factor 3 in stress-induced  $\beta$ -cell apoptosis. *Mol Cell Biol* 24:5721–5732
  202. Huang CJ, Lin CY, Haataja L, Gurlo T, Butler AE, Rizza RA, Butler PC 2007 High expression rates of human islet amyloid polypeptide induce endoplasmic reticulum stress mediated  $\beta$ -cell apoptosis, a characteristic of humans with type 2 but not type 1 diabetes. *Diabetes* 56:2016–2027
  203. Copanaki E, Schurmann T, Eckert A, Leuner K, Muller WE, Prehn JH, Kogel D 2007 The amyloid precursor protein potentiates CHOP induction and cell death in response to ER Ca<sup>2+</sup> depletion. *Biochim Biophys Acta* 1773:157–165
  204. Casas S, Gomis R, Gribble FM, Altirriba J, Knuttila S, Novials A 2007 Impairment of the ubiquitin-proteasome pathway is a downstream ER stress response induced by extracellular human islet amyloid polypeptide and contributes to pancreatic  $\beta$ -cell apoptosis. *Diabetes* 56:2284–2294
  205. Oyadomari S, Koizumi A, Takeda K, Gotoh T, Akira S, Araki E, Mori M 2002 Targeted disruption of the Chop gene delays endo-

- plasmic reticulum stress-mediated diabetes. *J Clin Invest* 109:525–532
206. Ishihara H, Takeda S, Tamura A, Takahashi R, Yamaguchi S, Takei D, Yamada T, Inoue H, Soga H, Katagiri H, Tanizawa Y, Oka Y 2004 Disruption of the WFS1 gene in mice causes progressive  $\beta$ -cell loss and impaired stimulus-secretion coupling in insulin secretion. *Hum Mol Genet* 13:1159–1170
  207. Riggs AC, Bernal-Mizrachi E, Ohsugi M, Wasson J, Fatrai S, Welling C, Murray J, Schmidt RE, Herrera PL, Permutt MA 2005 Mice conditionally lacking the Wolfram gene in pancreatic islet  $\beta$  cells exhibit diabetes as a result of enhanced endoplasmic reticulum stress and apoptosis. *Diabetologia* 48:2313–2321
  208. Yamada T, Ishihara H, Tamura A, Takahashi R, Yamaguchi S, Takei D, Tokita A, Satake C, Tashiro F, Katagiri H, Aburatani H, Miyazaki J, Oka Y 2006 WFS1-deficiency increases endoplasmic reticulum stress, impairs cell cycle progression and triggers the apoptotic pathway specifically in pancreatic  $\beta$ -cells. *Hum Mol Genet* 15:1600–1609
  209. Scheuner D, Song B, McEwen E, Liu C, Laybutt R, Gillespie P, Saunders T, Bonner-Weir S, Kaufman RJ 2001 Translational control is required for the unfolded protein response and in vivo glucose homeostasis. *Mol Cell* 7:1165–1176
  210. Ladiges WC, Knoblauch SE, Morton JF, Korth MJ, Sopher BL, Baskin CR, MacAuley A, Goodman AG, LeBoeuf RC, Katze MG 2005 Pancreatic  $\beta$ -cell failure and diabetes in mice with a deletion mutation of the endoplasmic reticulum molecular chaperone gene P58<sup>IPK</sup>. *Diabetes* 54:1074–1081
  211. Yusta B, Baggio LL, Estall JL, Koehler JA, Holland DP, Li H, Pipeleers D, Ling Z, Drucker DJ 2006 GLP-1 receptor activation improves  $\beta$  cell function and survival following induction of endoplasmic reticulum stress. *Cell Metab* 4:391–406
  212. Yu W, Niwa T, Miura Y, Horio F, Teradaira S, Ribar TJ, Means AR, Hasegawa Y, Senda T, Niki I 2002 Calmodulin overexpression causes Ca<sup>2+</sup>-dependent apoptosis of pancreatic  $\beta$  cells, which can be prevented by inhibition of nitric oxide synthase. *Lab Invest* 82:1229–1239
  213. Tsunekawa S, Yamamoto N, Tsukamoto K, Itoh Y, Kaneko Y, Kimura T, Ariyoshi Y, Miura Y, Oiso Y, Niki I 2007 Protection of pancreatic  $\beta$ -cells by exendin-4 may involve the reduction of endoplasmic reticulum stress; in vivo and in vitro studies. *J Endocrinol* 193:65–74
  214. Kharroubi I, Ladrerie L, Cardozo AK, Dogusan Z, Cnop M, Eizirik DL 2004 Free fatty acids and cytokines induce pancreatic  $\beta$ -cell apoptosis by different mechanisms: role of nuclear factor- $\kappa$ B and endoplasmic reticulum stress. *Endocrinology* 145:5087–5096
  215. Karaskov E, Scott C, Zhang L, Teodoro T, Ravazzola M, Volchuk A 2006 Chronic palmitate but not oleate exposure induces endoplasmic reticulum stress, which may contribute to INS-1 pancreatic  $\beta$ -cell apoptosis. *Endocrinology* 147:3398–3407
  216. Harding HP, Zhang Y, Bertolotti A, Zeng H, Ron D 2000 Perk is essential for translational regulation and cell survival during the unfolded protein response. *Mol Cell* 5:897–904
  217. Jousse C, Oyadomari S, Novoa I, Lu P, Zhang Y, Harding HP, Ron D 2003 Inhibition of a constitutive translation initiation factor 2 $\alpha$  phosphatase, CREP, promotes survival of stressed cells. *J Cell Biol* 163:767–775
  218. Lu PD, Jousse C, Marciniak SJ, Zhang Y, Novoa I, Scheuner D, Kaufman RJ, Ron D, Harding HP 2004 Cytoprotection by pre-emptive conditional phosphorylation of translation initiation factor 2. *EMBO J* 23:169–179
  219. Lawrence MC, McGlynn K, Naziruddin B, Levy MF, Cobb MH 2007 Differential regulation of CHOP-10/GADD153 gene expression by MAPK signaling in pancreatic  $\beta$ -cells. *Proc Natl Acad Sci USA* 104:11518–11525
  220. O'Brien BA, Harmon BV, Cameron DP, Allan DJ 1997 Apoptosis is the mode of  $\beta$ -cell death responsible for the development of IDDM in the nonobese diabetic (NOD) mouse. *Diabetes* 46:750–757
  221. Jörns A, Gunther A, Hedrich HJ, Wedekind D, Tiedge M, Lenzen S 2005 Immune cell infiltration, cytokine expression, and  $\beta$ -cell apoptosis during the development of type 1 diabetes in the spontaneously diabetic LEW.1AR1/Ztm-iddm rat. *Diabetes* 54:2041–2052
  222. Uno S, Imagawa A, Okita K, Sayama K, Moriwaki M, Iwahashi H, Yamagata K, Tamura S, Matsuzawa Y, Hanafusa T, Miyagawa J, Shimomura I 2007 Macrophages and dendritic cells infiltrating islets with or without  $\beta$  cells produce tumour necrosis factor- $\alpha$  in patients with recent-onset type 1 diabetes. *Diabetologia* 50:596–601
  223. Southern C, Schulster D, Green IC 1990 Inhibition of insulin secretion by interleukin-1 $\beta$  and tumour necrosis factor- $\alpha$  via an L-arginine-dependent nitric oxide generating mechanism. *FEBS Lett* 276:42–44
  224. Welsh N, Eizirik DL, Bendtzen K, Sandler S 1991 Interleukin-1 $\beta$ -induced nitric oxide production in isolated rat pancreatic islets requires gene transcription and may lead to inhibition of the Krebs cycle enzyme aconitase. *Endocrinology* 129:3167–3173
  225. Eizirik DL, Cagliero E, Bjorklund A, Welsh N 1992 Interleukin-1 $\beta$  induces the expression of an isoform of nitric oxide synthase in insulin-producing cells, which is similar to that observed in activated macrophages. *FEBS Lett* 308:249–252
  226. Mandrup-Poulsen T 2001  $\beta$ -Cell apoptosis: stimuli and signaling. *Diabetes* 50(Suppl 1):S58–S63
  227. Liu D, Pavlovic D, Chen MC, Flodstrom M, Sandler S, Eizirik DL 2000 Cytokines induce apoptosis in  $\beta$ -cells isolated from mice lacking the inducible isoform of nitric oxide synthase (iNOS<sup>-/-</sup>). *Diabetes* 49:1116–1122
  228. Cardozo AK, Heimberg H, Heremans Y, Leeman R, Kutlu B, Kruhoffer M, Orntoft T, Eizirik DL 2001 A comprehensive analysis of cytokine-induced and nuclear factor- $\kappa$ B-dependent genes in primary rat pancreatic  $\beta$ -cells. *J Biol Chem* 276:48879–48886
  229. Cardozo AK, Kruhoffer M, Leeman R, Orntoft T, Eizirik DL 2001 Identification of novel cytokine-induced genes in pancreatic  $\beta$ -cells by high-density oligonucleotide arrays. *Diabetes* 50:909–920
  230. Kutlu B, Cardozo AK, Darville MI, Kruhoffer M, Magnusson N, Orntoft T, Eizirik DL 2003 Discovery of gene networks regulating cytokine-induced dysfunction and apoptosis in insulin-producing INS-1 cells. *Diabetes* 52:2701–2719
  231. Gysemans CA, Ladrerie L, Callewaert H, Rasschaert J, Flamez D, Levy DE, Matthys P, Eizirik DL, Mathieu C 2005 Disruption of the  $\gamma$ -interferon signaling pathway at the level of signal transducer and activator of transcription-1 prevents immune destruction of  $\beta$ -cells. *Diabetes* 54:2396–2403
  232. Eldor R, Yeffet A, Baum K, Doviner V, Amar D, Ben-Neriah Y, Christofori G, Peled A, Carel JC, Boitard C, Klein T, Serup P, Eizirik DL, Melloul D 2006 Conditional and specific NF- $\kappa$ B blockade protects pancreatic  $\beta$  cells from diabetogenic agents. *Proc Natl Acad Sci USA* 103:5072–5077
  233. Callewaert HI, Gysemans CA, Ladrerie L, D'Hertog W, Hagenbrock J, Overbergh L, Eizirik DL, Mathieu C 2007 Deletion of STAT-1 pancreatic islets protects against streptozotocin-induced diabetes and early graft failure but not against late rejection. *Diabetes* 56:2169–2173
  234. Darville MI, Eizirik DL 1998 Regulation by cytokines of the inducible nitric oxide synthase promoter in insulin-producing cells. *Diabetologia* 41:1101–1108
  235. Cardozo AK, Ortis F, Storling J, Feng YM, Rasschaert J, Tonnesen M, Van Eylen F, Mandrup-Poulsen T, Herchuelz A, Eizirik DL 2005 Cytokines downregulate the sarcoendoplasmic reticulum pump Ca<sup>2+</sup> ATPase 2b and deplete endoplasmic reticulum Ca<sup>2+</sup>, leading to induction of endoplasmic reticulum stress in pancreatic  $\beta$ -cells. *Diabetes* 54:452–461
  236. Zhou YP, Teng D, Dralyuk F, Ostrega D, Roe MW, Philipson L, Polonsky KS 1998 Apoptosis in insulin-secreting cells. Evidence for the role of intracellular Ca<sup>2+</sup> stores and arachidonic acid metabolism. *J Clin Invest* 101:1623–1632
  237. Wang M, Zhao XR, Wang P, Li L, Dai Y, Huang H, Lei P, Zhu HF, Shen GX 2007 Glucose regulated proteins 78 protects insulinoma cells (NIT-1) from death induced by streptozotocin, cytokines or cytotoxic T lymphocytes. *Int J Biochem Cell Biol* 39:2076–2082
  238. Uehara T, Nakamura T, Yao D, Shi ZQ, Gu Z, Ma Y, Masliah E, Nomura Y, Lipton SA 2006 S-Nitrosylated protein-disulphide isomerase links protein misfolding to neurodegeneration. *Nature* 441:513–517
  239. Uehara T 2007 Accumulation of misfolded protein through nitrosative stress linked to neurodegenerative disorders. *Antioxid Redox Signal* 9:597–601
  240. Kitiphongspattana K, Khan TA, Ishii-Schrade K, Roe MW, Phil-

- ipson LH, Gaskins HR 2007 Protective role for nitric oxide during the endoplasmic reticulum stress response in pancreatic  $\beta$ -cells. *Am J Physiol Endocrinol Metab* 292:E1543–E1554
241. Pirot P, Eizirik DL, Cardozo AK 2006 Interferon- $\gamma$  potentiates endoplasmic reticulum stress-induced death by reducing pancreatic  $\beta$  cell defence mechanisms. *Diabetologia* 49:1229–1236
  242. Rasschaert J, Liu D, Kutlu B, Cardozo AK, Kruhoff M, Orntoft TF, Eizirik DL 2003 Global profiling of double stranded RNA- and IFN- $\gamma$ -induced genes in rat pancreatic  $\beta$  cells. *Diabetologia* 46:1641–1657
  243. Romisch K 1999 Surfing the Sec61 channel: bidirectional protein translocation across the ER membrane. *J Cell Sci* 112:4185–4191
  244. Eizirik DL, Sandler S, Welsh N, Cetkovic-Cvrlje M, Nieman A, Geller DA, Pipeleers DG, Bendtzen K, Hellerstrom C 1994 Cytokines suppress human islet function irrespective of their effects on nitric oxide generation. *J Clin Invest* 93:1968–1974
  245. Zumsteg U, Frigerio S, Hollander GA 2000 Nitric oxide production and Fas surface expression mediate two independent pathways of cytokine-induced murine  $\beta$ -cell damage. *Diabetes* 49:39–47
  246. Eizirik DL, Darville MI 2001  $\beta$ -Cell apoptosis and defense mechanisms: lessons from type 1 diabetes. *Diabetes* 50(Suppl 1):S64–S69
  247. Rutkowski DT, Arnold SM, Miller CN, Wu J, Li J, Gunnison KM, Mori K, Sadighi Akha AA, Raden D, Kaufman RJ 2006 Adaptation to ER stress is mediated by differential stabilities of pro-survival and pro-apoptotic mRNAs and proteins. *PLoS Biol* 4:e374
  248. Eizirik DL, Strandell E, Bendtzen K, Sandler S 1988 Functional characteristics of rat pancreatic islets maintained in culture after exposure to human interleukin 1. *Diabetes* 37:916–919
  249. Strandell E, Eizirik DL, Sandler S 1990 Reversal of  $\beta$ -cell suppression in vitro in pancreatic islets isolated from nonobese diabetic mice during the phase preceding insulin-dependent diabetes mellitus. *J Clin Invest* 85:1944–1950
  250. Eizirik DL, Strandell E, Sandler S 1991 Prolonged exposure of pancreatic islets isolated from “pre-diabetic” non-obese diabetic mice to a high glucose concentration does not impair  $\beta$ -cell function. *Diabetologia* 34:6–11
  251. Hotamisligil GS 2005 Role of endoplasmic reticulum stress and c-Jun NH2-terminal kinase pathways in inflammation and origin of obesity and diabetes. *Diabetes* 54(Suppl 2):S73–S78
  252. Kaneto H, Nakatani Y, Kawamori D, Miyatsuka T, Matsuoaka TA, Matsuhisa M, Yamasaki Y 2005 Role of oxidative stress, endoplasmic reticulum stress, and c-Jun N-terminal kinase in pancreatic  $\beta$ -cell dysfunction and insulin resistance. *Int J Biochem Cell Biol* 37:1595–1608
  253. Sell H, Dietze-Schroeder D, Eckel J 2006 The adipocyte-myocyte axis in insulin resistance. *Trends Endocrinol Metab* 17:416–422
  254. Tsiotra PC, Tsigos C 2006 Stress, the endoplasmic reticulum, and insulin resistance. *Ann NY Acad Sci* 1083:63–76
  255. Gregor MF, Hotamisligil GS 2007 Thematic review series: adipocyte biology. Adipocyte stress: the endoplasmic reticulum and metabolic disease. *J Lipid Res* 48:1905–1914
  256. Ozcan U, Cao Q, Yilmaz E, Lee AH, Iwakoshi NN, Ozdelen E, Tuncman G, Gorgun C, Glimcher LH, Hotamisligil GS 2004 Endoplasmic reticulum stress links obesity, insulin action, and type 2 diabetes. *Science* 306:457–461
  257. Hirosumi J, Tuncman G, Chang L, Gorgun CZ, Uysal KT, Maeda K, Karin M, Hotamisligil GS 2002 A central role for JNK in obesity and insulin resistance. *Nature* 420:333–336
  258. Wang D, Wei Y, Schmoll D, Maclean KN, Pagliassotti MJ 2006 Endoplasmic reticulum stress increases glucose-6-phosphatase and glucose cycling in liver cells. *Endocrinology* 147:350–358
  259. Deng J, Lu PD, Zhang Y, Scheuner D, Kaufman RJ, Sonenberg N, Harding HP, Ron D 2004 Translational repression mediates activation of nuclear factor  $\kappa$ B by phosphorylated translation initiation factor 2. *Mol Cell Biol* 24:10161–10168
  260. Hung JH, Su IJ, Lei HY, Wang HC, Lin WC, Chang WT, Huang W, Chang WC, Chang YS, Chen CC, Lai MD 2004 Endoplasmic reticulum stress stimulates the expression of cyclooxygenase-2 through activation of NF- $\kappa$ B and pp38 mitogen-activated protein kinase. *J Biol Chem* 279:46384–46392
  261. Shoelson SE, Lee J, Goldfine AB 2006 Inflammation and insulin resistance. *J Clin Invest* 116:1793–1801
  262. Arkan MC, Hevener AL, Greten FR, Maeda S, Li ZW, Long JM, Wynshaw-Boris A, Poli G, Olefsky J, Karin M 2005 IKK- $\beta$  links inflammation to obesity-induced insulin resistance. *Nat Med* 11:191–198
  263. Cai D, Yuan M, Frantz DF, Melendez PA, Hansen L, Lee J, Shoelson SE 2005 Local and systemic insulin resistance resulting from hepatic activation of IKK- $\beta$  and NF- $\kappa$ B. *Nat Med* 11:183–190
  264. Solinas G, Naugler W, Galimi F, Lee MS, Karin M 2006 Saturated fatty acids inhibit induction of insulin gene transcription by JNK-mediated phosphorylation of insulin-receptor substrates. *Proc Natl Acad Sci USA* 103:16454–16459
  265. Wang D, Wei Y, Pagliassotti MJ 2006 Saturated fatty acids promote endoplasmic reticulum stress and liver injury in rats with hepatic steatosis. *Endocrinology* 147:943–951
  266. Goldstein JL, DeBose-Boyd RA, Brown MS 2006 Protein sensors for membrane sterols. *Cell* 124:35–46
  267. Ye J, Rawson RB, Komuro R, Chen X, Dave UP, Prywes R, Brown MS, Goldstein JL 2000 ER stress induces cleavage of membrane-bound ATF6 by the same proteases that process SREBPs. *Mol Cell* 6:1355–1364
  268. Werstuck GH, Lentz SR, Dayal S, Hossain GS, Sood SK, Shi YY, Zhou J, Maeda N, Krisans SK, Malinow MR, Austin RC 2001 Homocysteine-induced endoplasmic reticulum stress causes dysregulation of the cholesterol and triglyceride biosynthetic pathways. *J Clin Invest* 107:1263–1273
  269. Wang H, Kouri G, Wollheim CB 2005 ER stress and SREBP-1 activation are implicated in  $\beta$ -cell glucolipototoxicity. *J Cell Sci* 118:3905–3915
  270. Nakatani Y, Kaneto H, Kawamori D, Yoshiuchi K, Hatazaki M, Matsuoaka TA, Ozawa K, Ogawa S, Hori M, Yamasaki Y, Matsuhisa M 2005 Involvement of endoplasmic reticulum stress in insulin resistance and diabetes. *J Biol Chem* 280:847–851
  271. Loffler M, Bilban M, Reimers M, Waldhausl W, Stulnig TM 2006 Blood glucose-lowering nuclear receptor agonists only partially normalize hepatic gene expression in db/db mice. *J Pharmacol Exp Ther* 316:797–804
  272. Ozawa K, Miyazaki M, Matsuhisa M, Takano K, Nakatani Y, Hatazaki M, Tamatani T, Yamagata K, Miyagawa J, Kitao Y, Hori O, Yamasaki Y, Ogawa S 2005 The endoplasmic reticulum chaperone improves insulin resistance in type 2 diabetes. *Diabetes* 54:657–663
  273. Welch WJ, Brown CR 1996 Influence of molecular and chemical chaperones on protein folding. *Cell Stress Chaperones* 1:109–115
  274. Ozcan U, Yilmaz E, Ozcan L, Furuhashi M, Vaillancourt E, Smith RO, Gorgun CZ, Hotamisligil GS 2006 Chemical chaperones reduce ER stress and restore glucose homeostasis in a mouse model of type 2 diabetes. *Science* 313:1137–1140
  275. Hosogai N, Fukuhara A, Oshima K, Miyata Y, Tanaka S, Segawa K, Furukawa S, Tochino Y, Komuro R, Matsuda M, Shimomura I 2007 Adipose tissue hypoxia in obesity and its impact on adipocytokine dysregulation. *Diabetes* 56:901–911
  276. Bashan N, Dorfman K, Tarnovscki T, Harman-Boehm I, Liberty IF, Bluher M, Ovadia S, Maymon-Zilberstein T, Potashnik R, Stumvoll M, Avinoach E, Rudich A 2007 Mitogen-activated protein kinases, inhibitory- $\kappa$ B kinase, and insulin signaling in human omental versus subcutaneous adipose tissue in obesity. *Endocrinology* 148:2955–2962
